# Supplementary material for: Mechanistic classification and benchmarking of polyolefin depolymerization over silica-alumina-based catalysts
Source: PubMed Central journal article supplement (PMC9385622; doi:10.1038/s41467-022-32563-y), 2022-08-17
Supplement: 41467_2022_32563_MOESM1_ESM.pdf [file 41467_2022_32563_MOESM1_ESM.pdf]

## Supplementary Information

Mechanistic classification and benchmarking of polyolefin depolymerization over silica-alumina-based catalysts

Wei-Tse Lee<sup>1</sup>, Antoine van Muyden<sup>1</sup>, Felix D. Bobbink<sup>1</sup>, Mounir D. Mensi<sup>1</sup>, Jed R. Carullo<sup>1</sup>, Paul J. Dyson<sup>1,\*</sup>

<sup>1</sup>Institute of Chemical Sciences and Engineering, École Polytechnique Fédérale de Lausanne (EPFL), Lausanne, Switzerland.

\*Corresponding author: Paul J. Dyson (paul.dyson@epfl.ch)

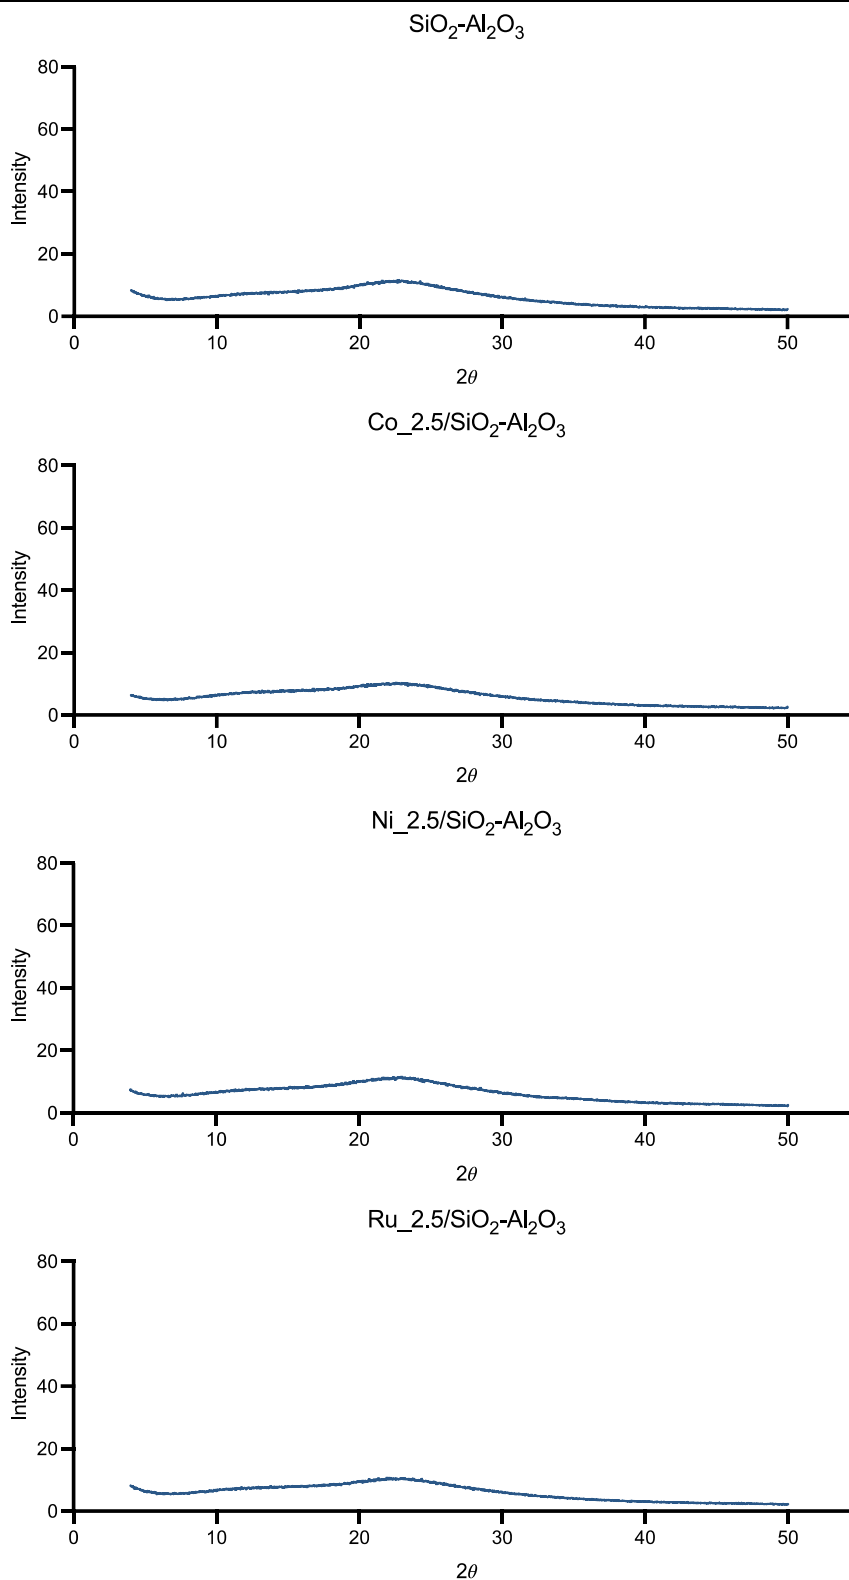

**Supplementary Figure 1 Powder X-ray of SiO<sub>2</sub>-Al<sub>2</sub>O<sub>3</sub>-based catalysts.** Measurements of SiO<sub>2</sub>-Al<sub>2</sub>O<sub>3</sub>, Co/SiO<sub>2</sub>-Al<sub>2</sub>O<sub>3</sub>, Ni/SiO<sub>2</sub>-Al<sub>2</sub>O<sub>3</sub> and Ru/SiO<sub>2</sub>-Al<sub>2</sub>O<sub>3</sub> with  $2\theta = 4$ -50 degree. Source data are provided as a Source Data file.

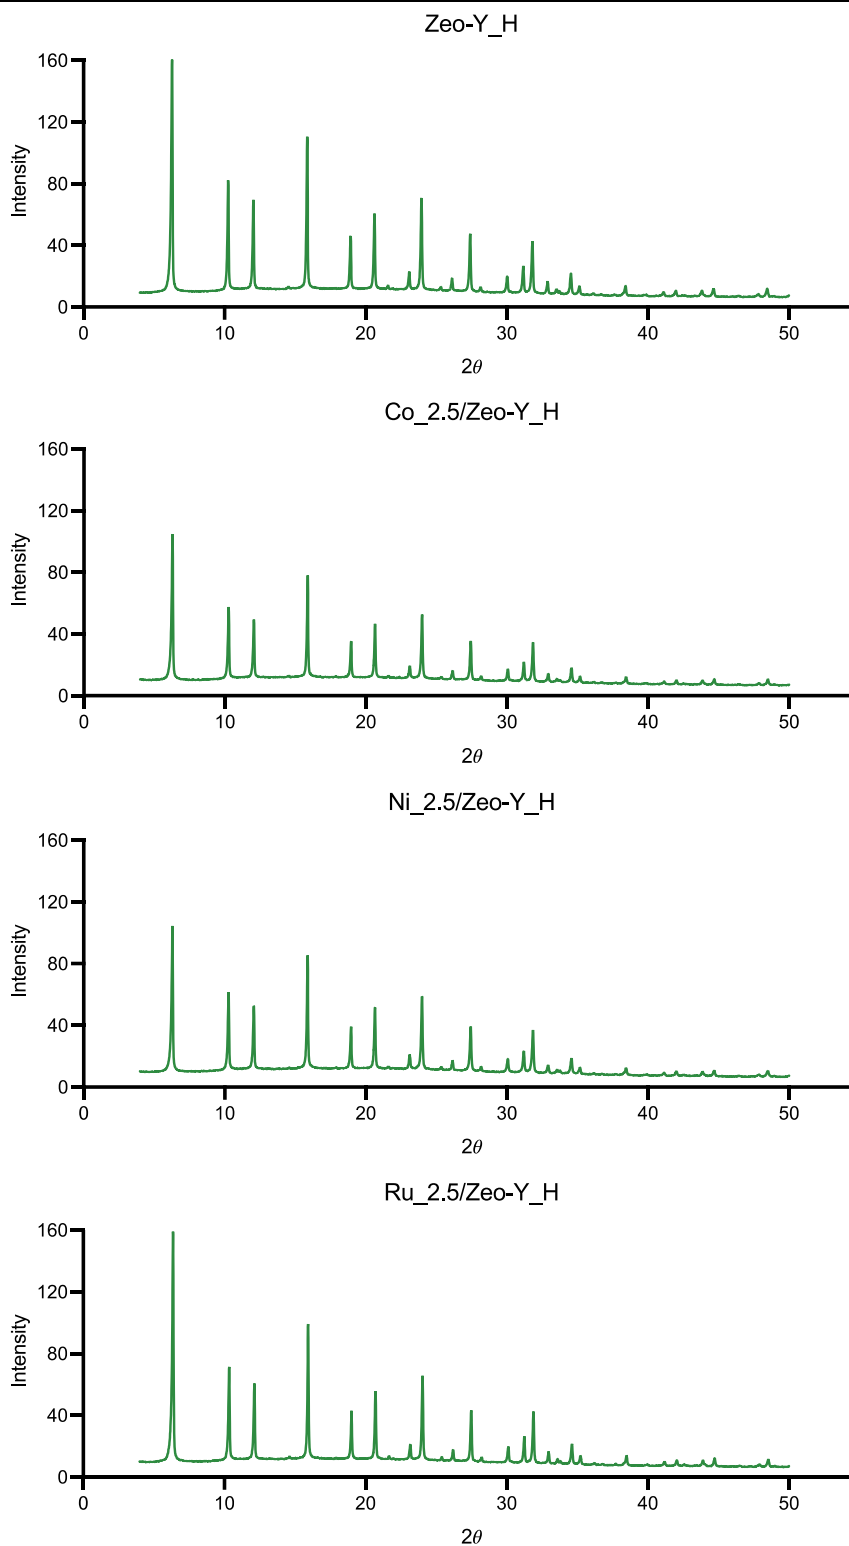

**Supplementary Figure 2 Powder X-ray of Zeo-Y\_H-based catalysts.** Measurements of Zeo-Y\_H, Co/Zeo-Y\_H, Ni/Zeo-Y\_H and Ru/Zeo-Y\_H with  $2\theta = 4$ -50 degree. Source data are provided as a Source Data file.

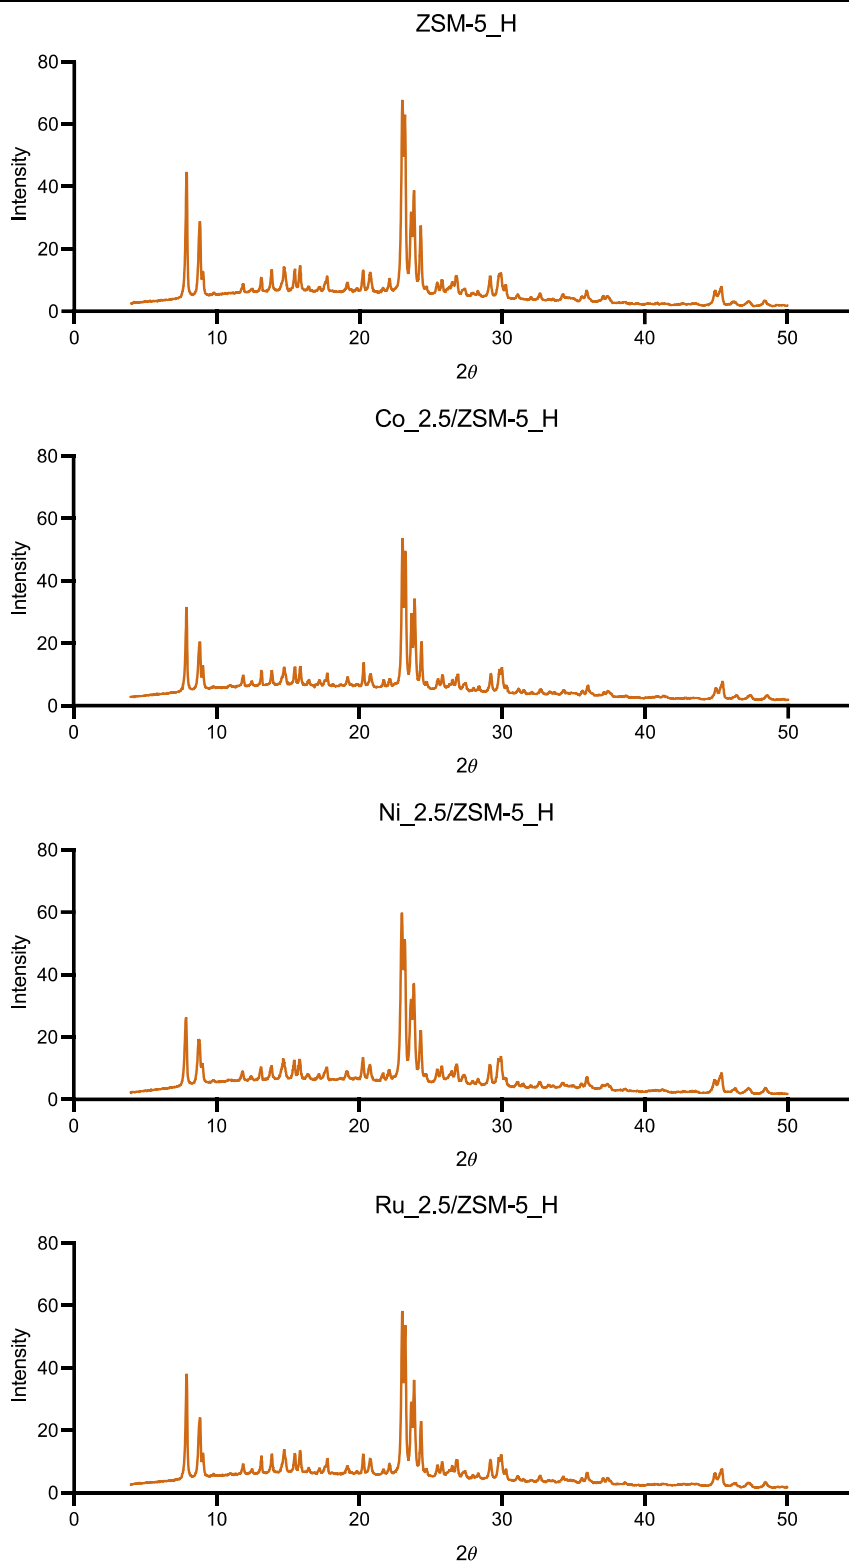

**Supplementary Figure 3 Powder X-ray of ZSM-5\_H-based catalysts.** Measurements of ZSM-5\_H, Co/ZSM-5\_H, Ni/ZSM-5\_H and Ru/ZSM-5\_H with  $2\theta = 4$ -50 degree. Source data are provided as a Source Data file.

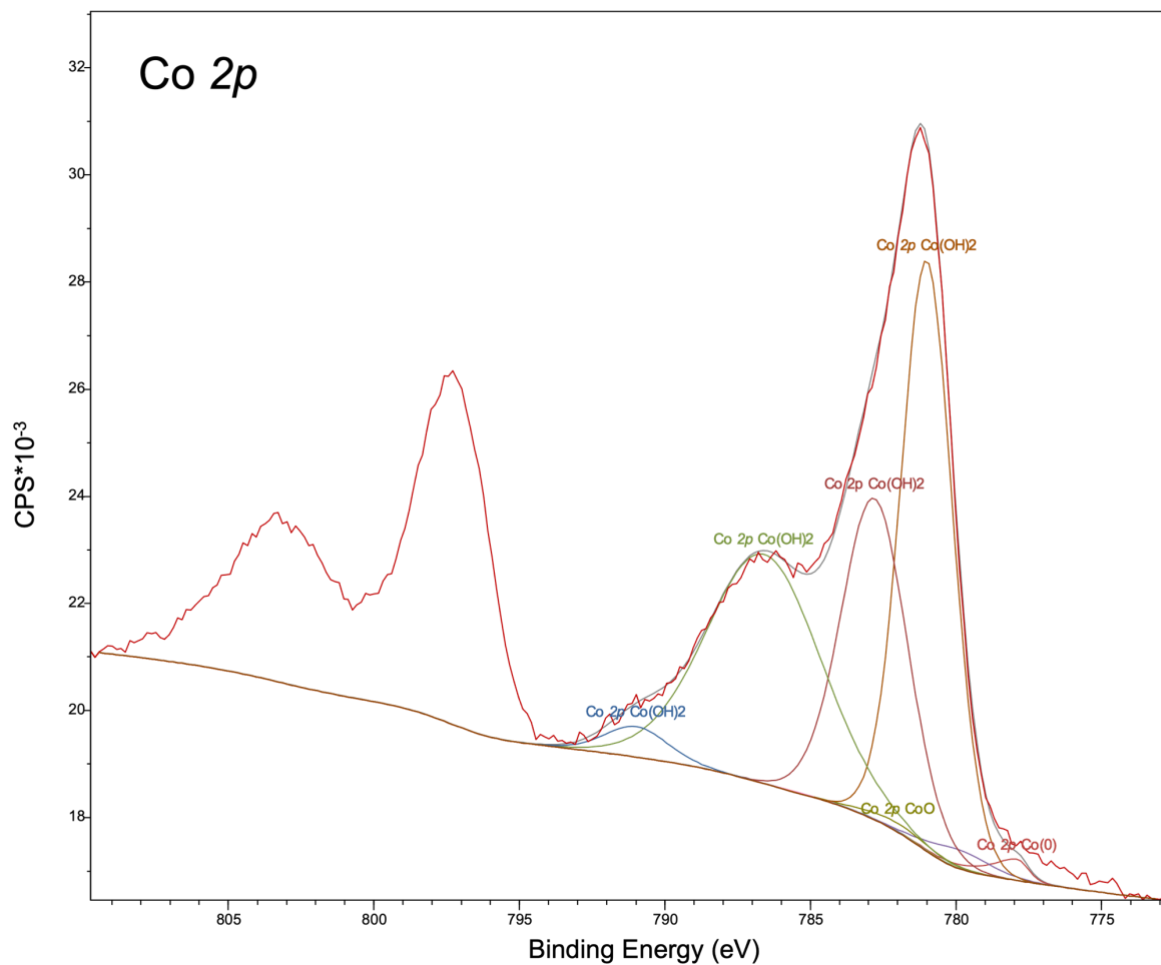

**Supplementary Figure 4 Curve fitted XPS analysis of Co 2p region of Co/ZSM-5\_H catalyst.** Fitting according to Mark Biesinger et al.<sup>1</sup> Source data are provided as a Source Data file.

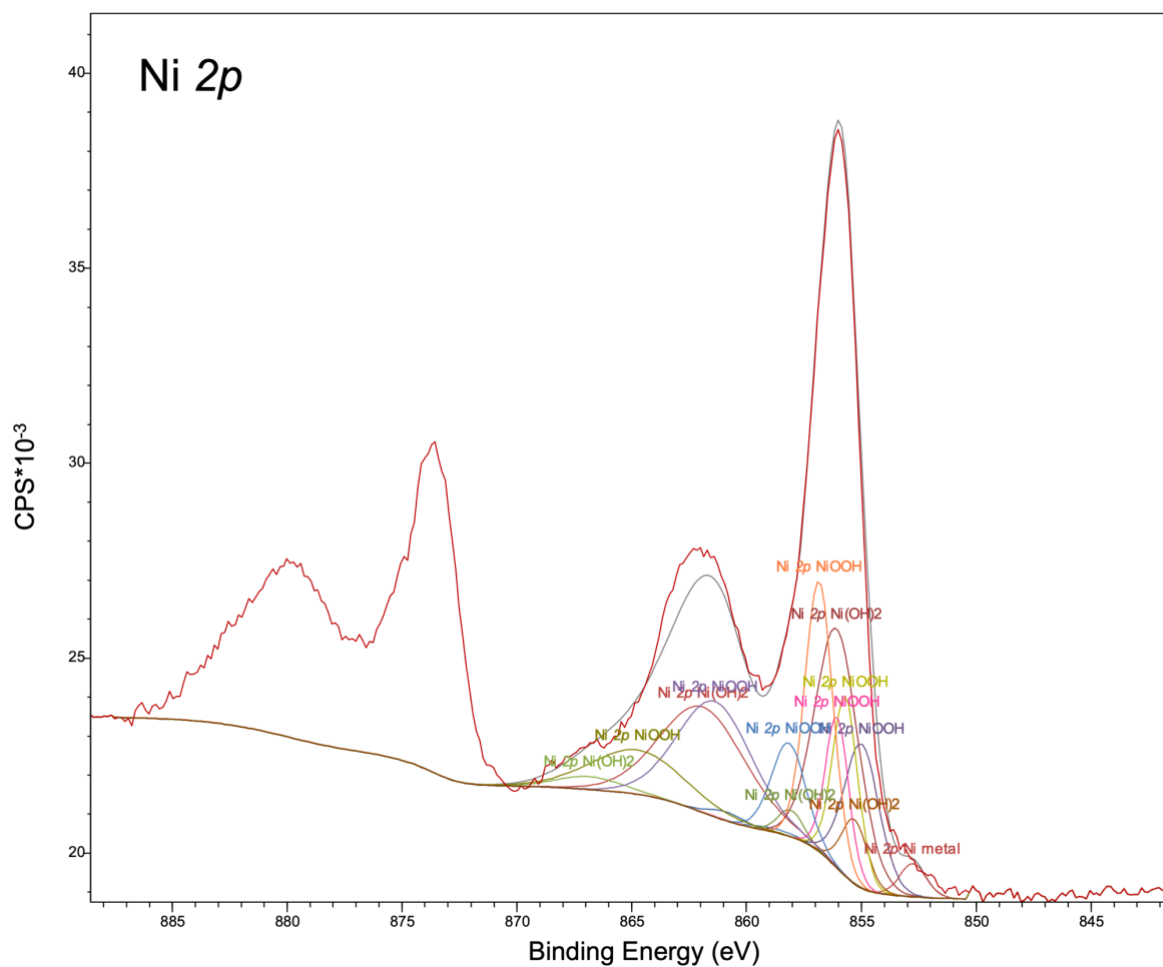

**Supplementary Figure 5 Curve fitted XPS analysis of Ni 2p region of Ni/ZSM-5\_H catalyst.** Fitting according to Mark Biesinger et al.<sup>1</sup> Source data are provided as a Source Data file.

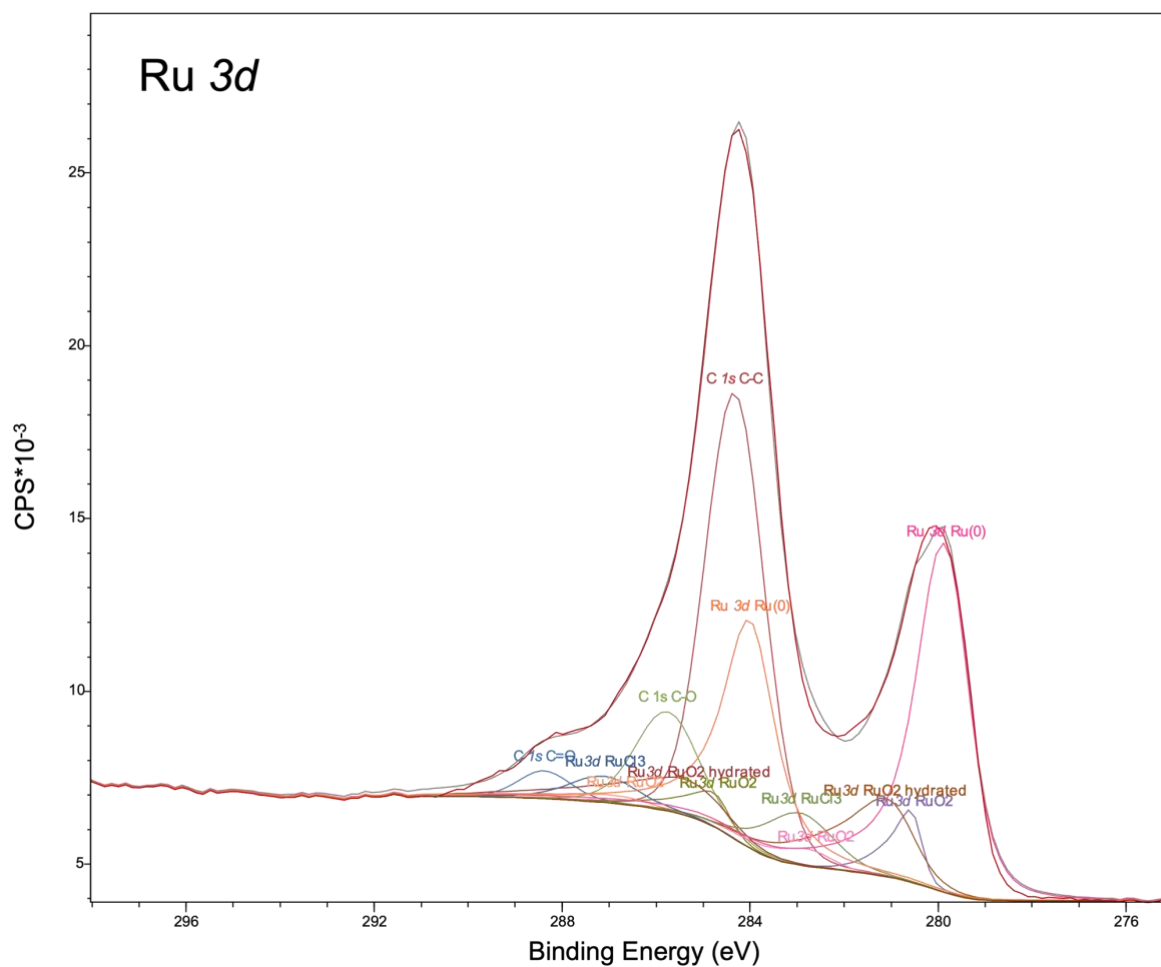

**Supplementary Figure 6 Curve fitted XPS analysis of Ru 3d and C 1s region of Ru/ZSM-5\_H catalyst.** Fitting according to David J. Morgan.<sup>2</sup> Source data are provided as a Source Data file.

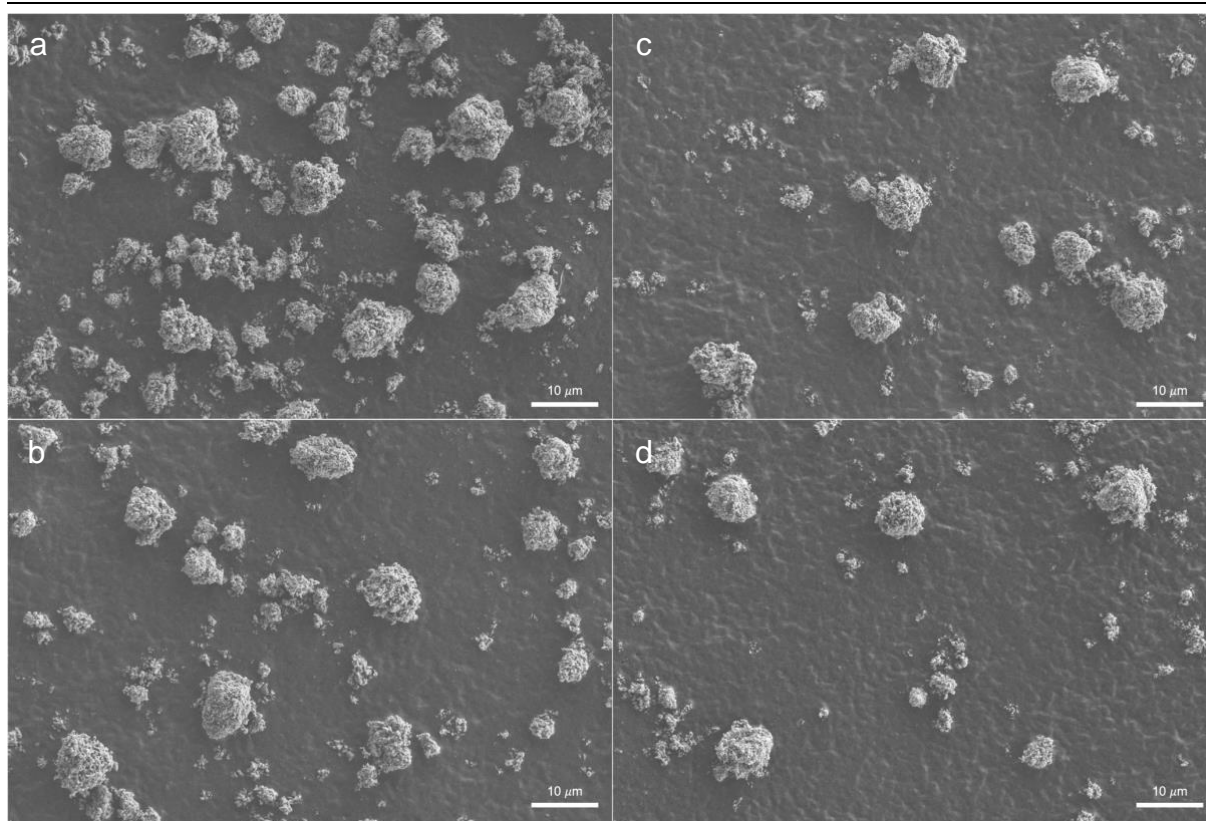

**Supplementary Figure 7 SEM images (scale bar = 10  $\mu\text{m}$ ) showing the particle distributions. a ZSM-5\_H (6.4-9.4  $\mu\text{m}$ ), b Co/ZSM-5\_H (6.3-9.7  $\mu\text{m}$ ), c Ni/ZSM-5\_H (6.3-8.6  $\mu\text{m}$ ) and d Ru/ZSM-5\_H (6.0-10.4  $\mu\text{m}$ ).**



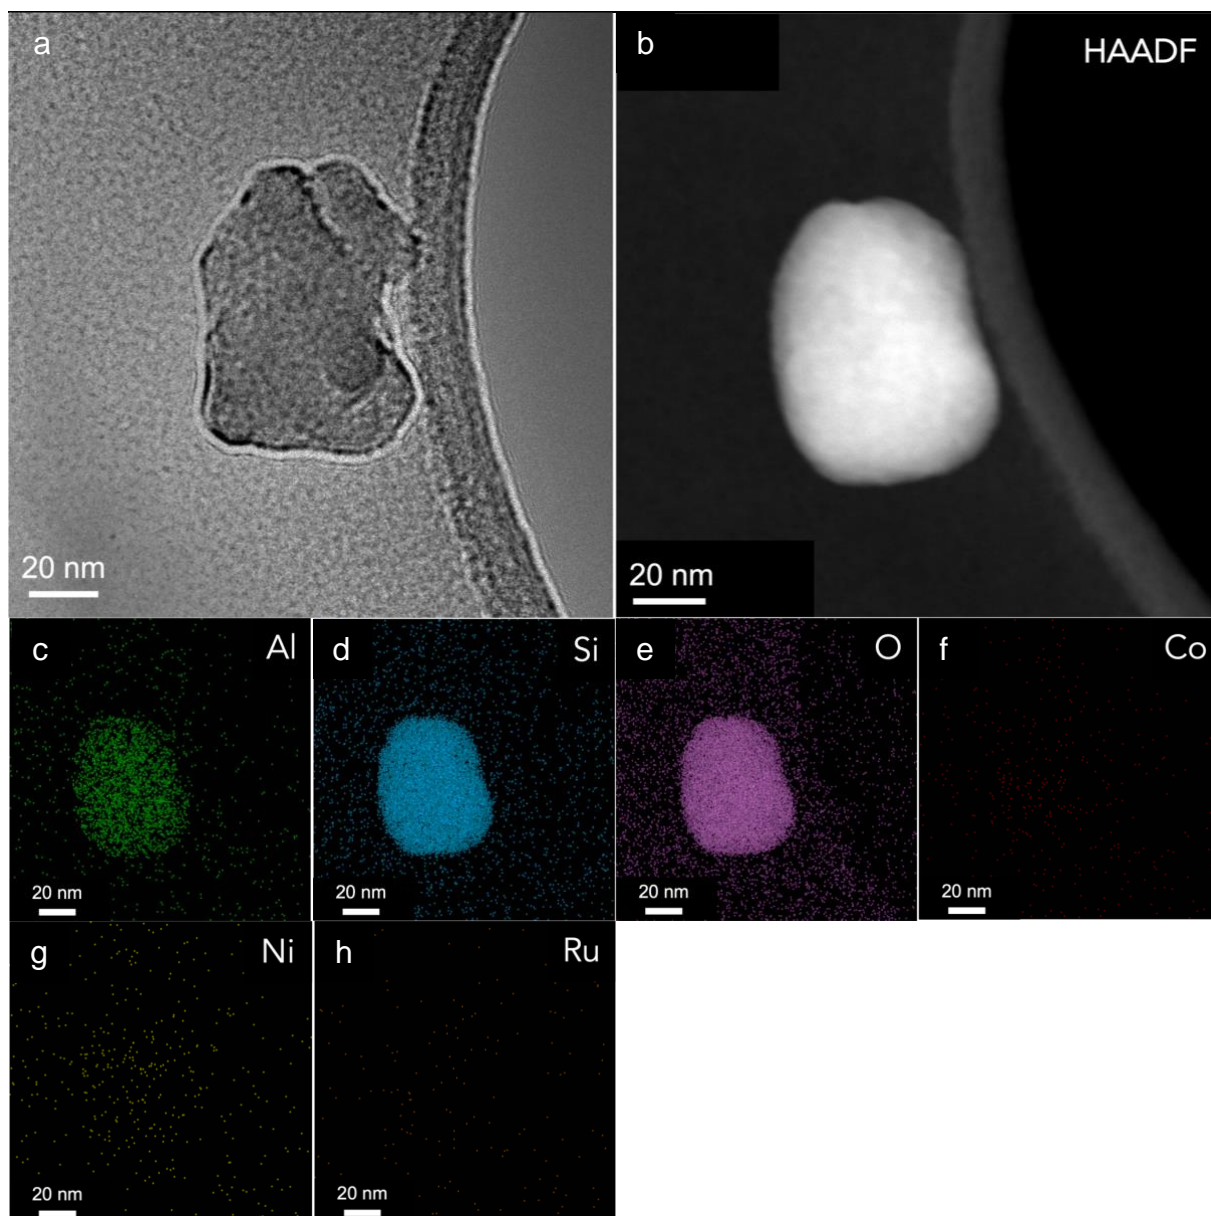

**Supplementary Figure 8 Electron microscopy images of ZSM-5\_H.** TEM bright-field image (scale bar = 20 nm) of **a** ZSM-5\_H. HAADF image (scale bar = 20 nm) of **b** ZSM-5\_H. STEM-EDS elemental mapping of **c** Al, **d** Si, **e** O, **f** Co, **g** Ni and **h** Ru.

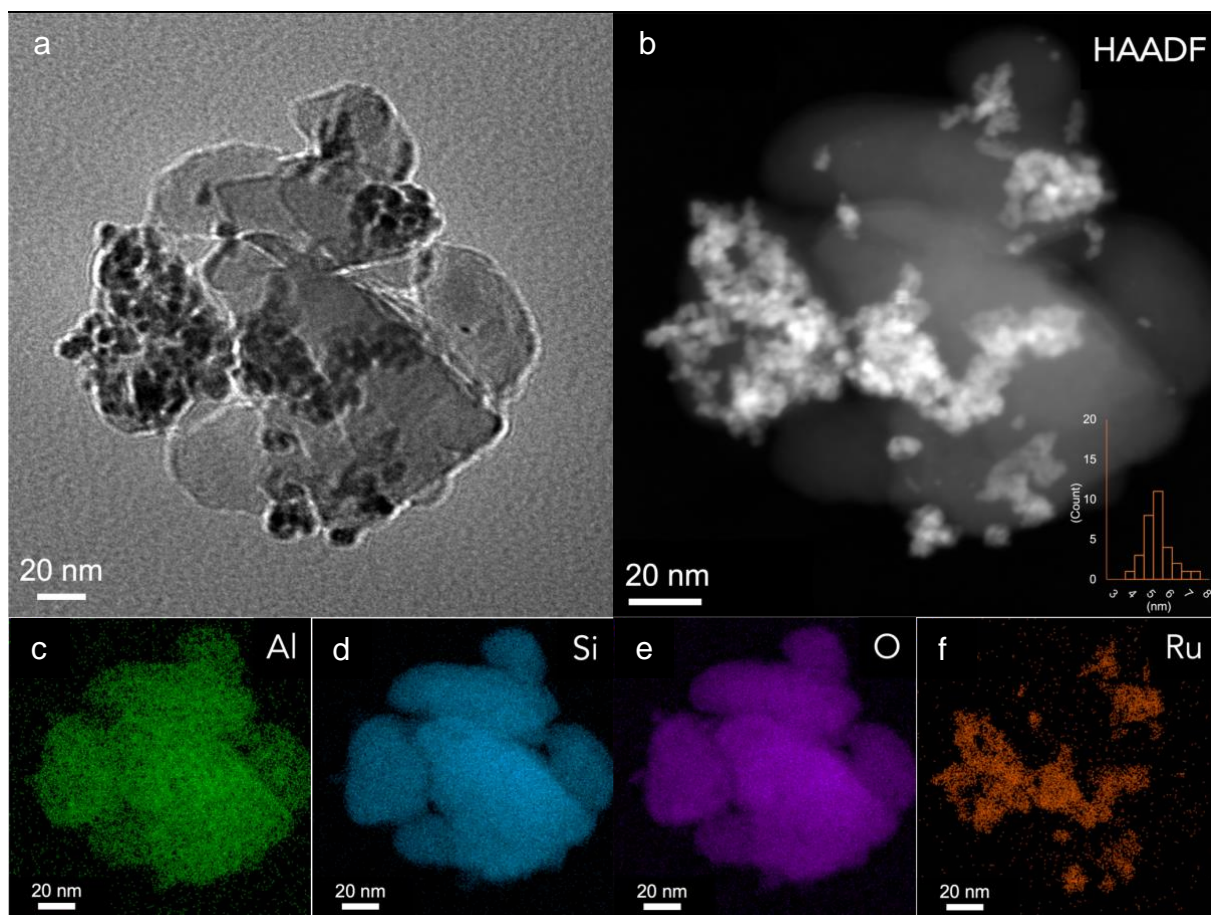

**Supplementary Figure 9 Electron microscopy images of Ru/ZSM-5\_H.** TEM bright-field image (scale bar = 20 nm) of **a** Ru/ZSM-5\_H. HAADF image (scale bar = 20 nm) of **b** Ru/ZSM-5\_H with Ru NP distributions =  $5.4 \pm 0.8$  nm. STEM-EDS elemental mapping of **c** Al, **d** Si, **e** O and **f** Ru.

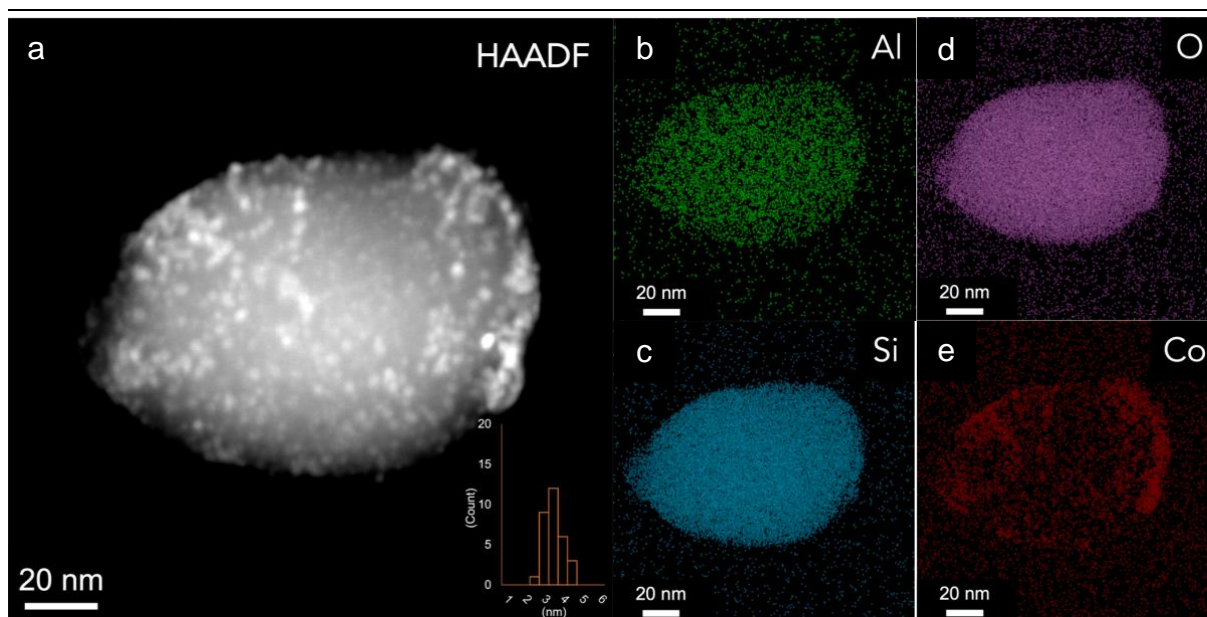

**Supplementary Figure 10 Electron microscopy images of Co/ZSM-5\_H.** HAADF image (scale bar = 20 nm) of **a** Co/ZSM-5\_H with Co NP distributions =  $3.6 \pm 0.5$  nm. STEM-EDS elemental mapping of **b** Al, **c** Si, **d** O and **e** Co.

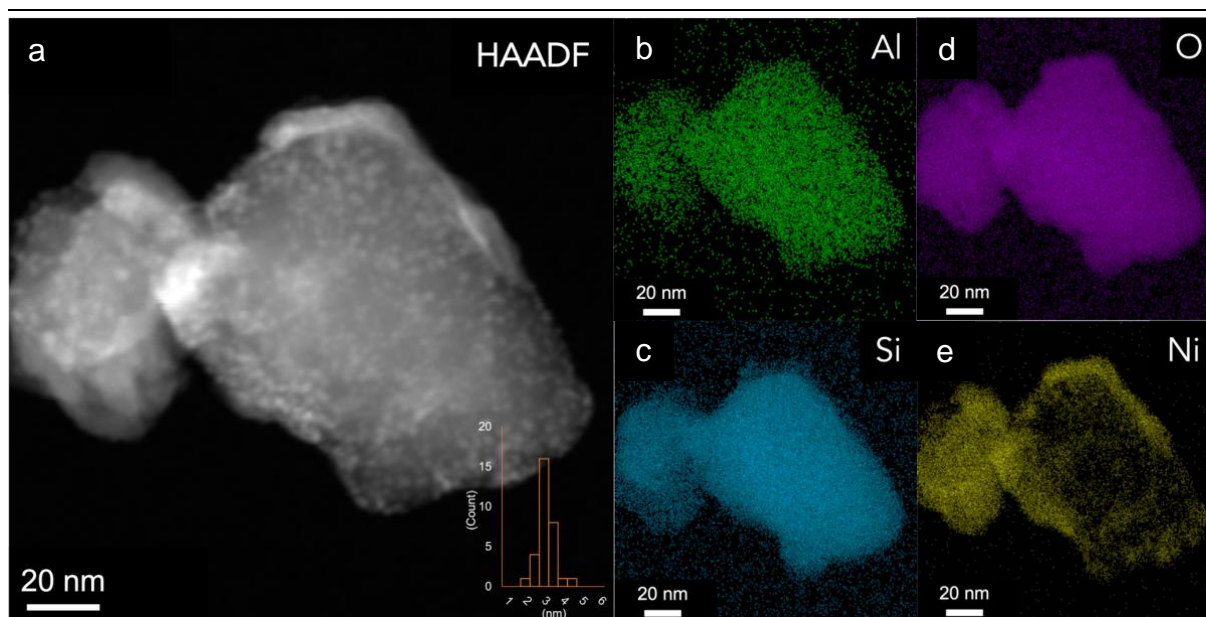

**Supplementary Figure 11 Electron microscopy images of Ni/ZSM-5\_H.** HAADF image (scale bar = 20 nm) of **a** Ni/ZSM-5\_H with Ni NP distributions =  $3.1 \pm 0.4$  nm. STEM-EDS elemental mapping of **b** Al, **c** Si, **d** O and **e** Ni.

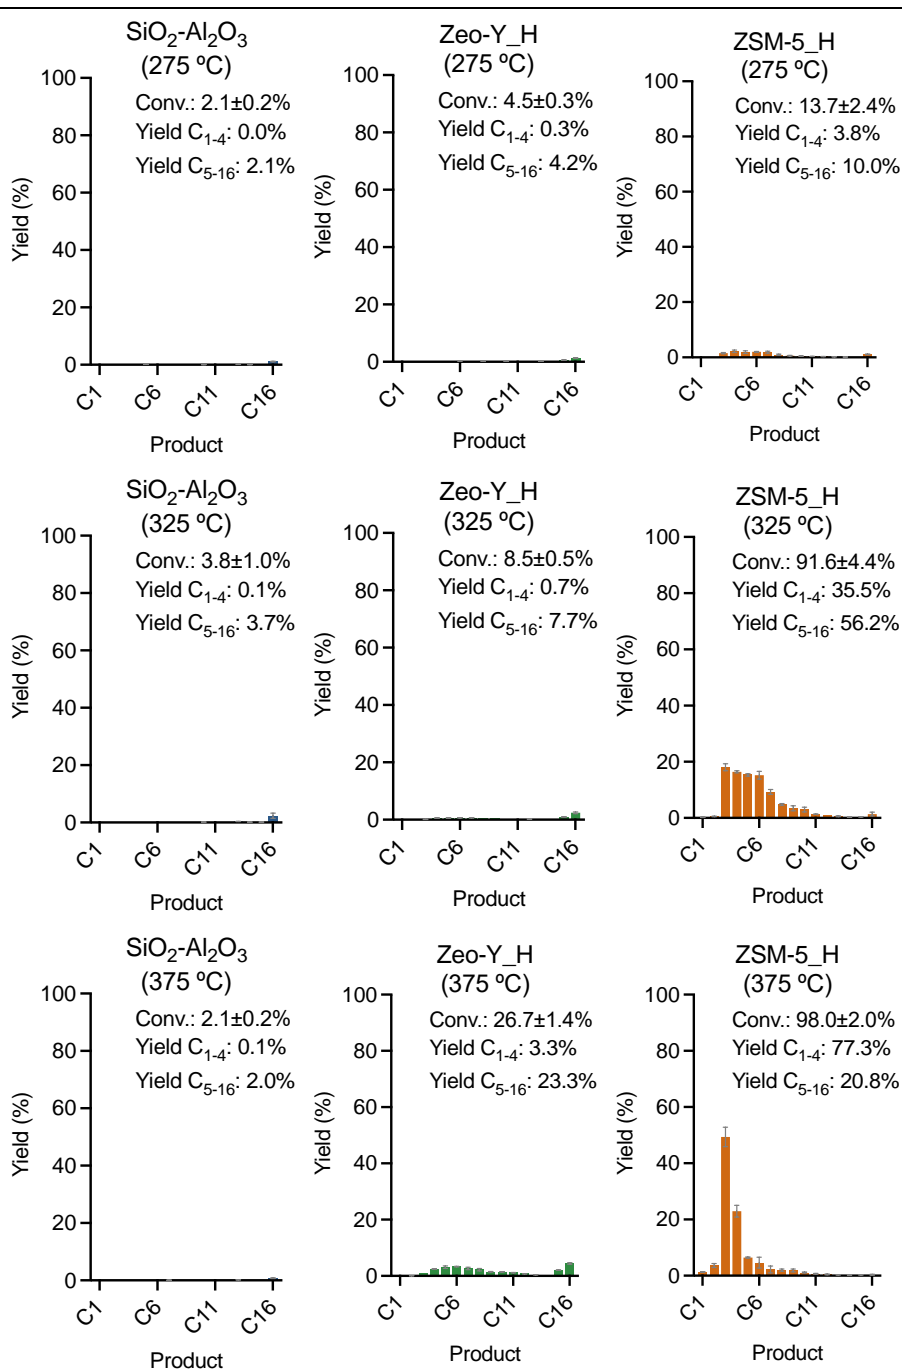

**Supplementary Figure 12 Product distributions after nC<sub>16</sub> (1.59 g) deconstructions.** In the presence of unmodified silica-alumina catalysts (0.1 g): SiO<sub>2</sub>-Al<sub>2</sub>O<sub>3</sub>, Zeo-Y\_H and ZSM-5\_H, 45 bar H<sub>2</sub>, 2 hrs. Note that nC<sub>12</sub> signal originated from the addition as an internal standard has been suppressed, and the yield of C<sub>12</sub> products was derived from the nC<sub>16</sub> substrate. Error bars = standard deviation. Source data are provided as a Source Data file.



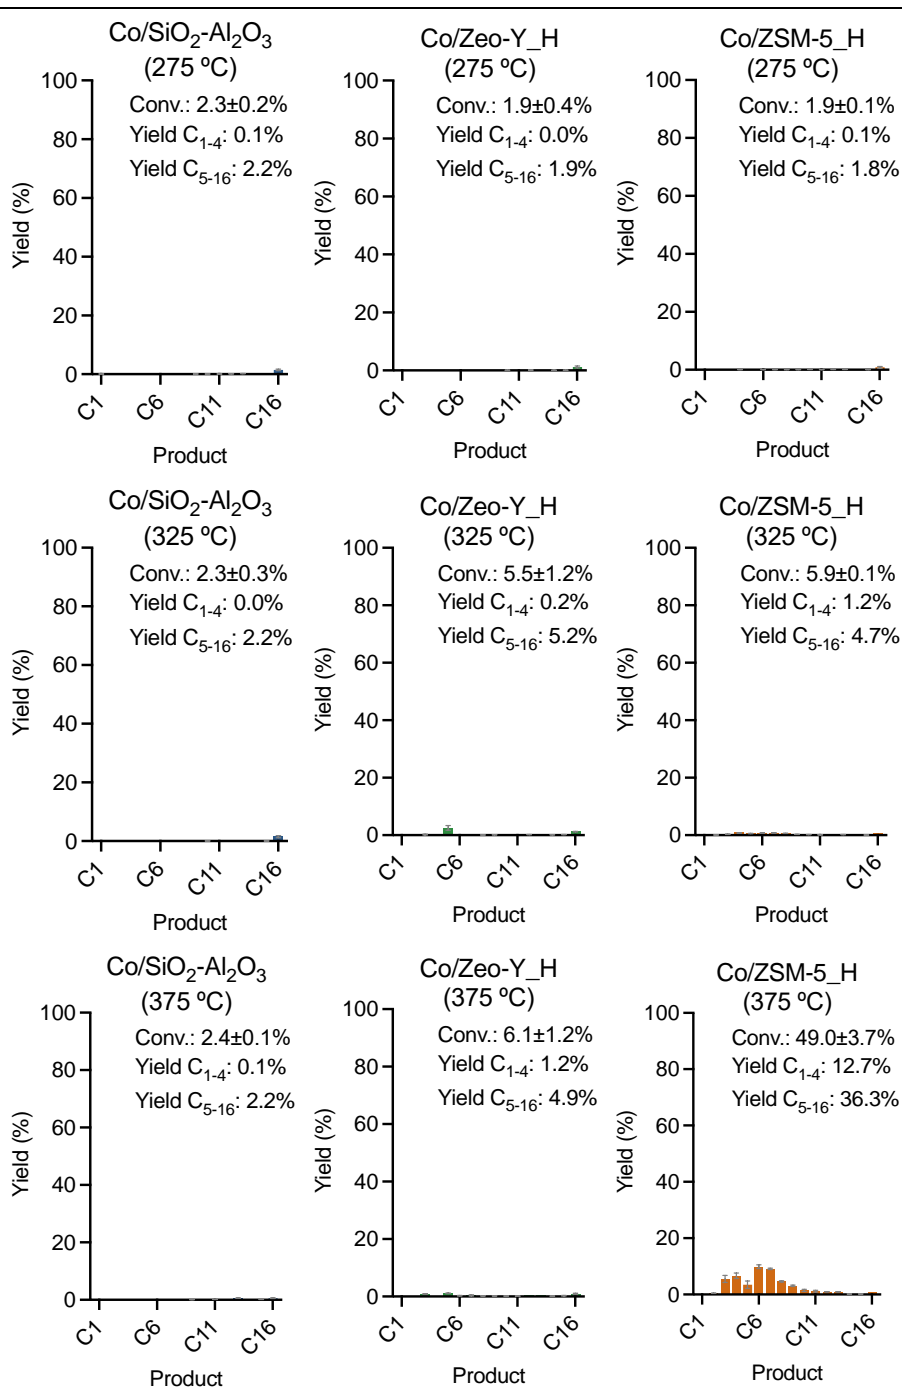

**Supplementary Figure 13 Product distributions after nC<sub>16</sub> (1.59 g) deconstructions.** In the presence of Co-modified catalysts (0.1 g, metal loading = 2.5 wt%): Co/SiO<sub>2</sub>-Al<sub>2</sub>O<sub>3</sub>, Co/Zeo-Y\_H and Co/ZSM-5\_H, 45 bar H<sub>2</sub>, 2 hrs. Note that nC<sub>12</sub> signal originated from the addition as an internal standard has been suppressed, and the yield of C<sub>12</sub> products was derived from the nC<sub>16</sub> substrate. Error bars = standard deviation. Source data are provided as a Source Data file.

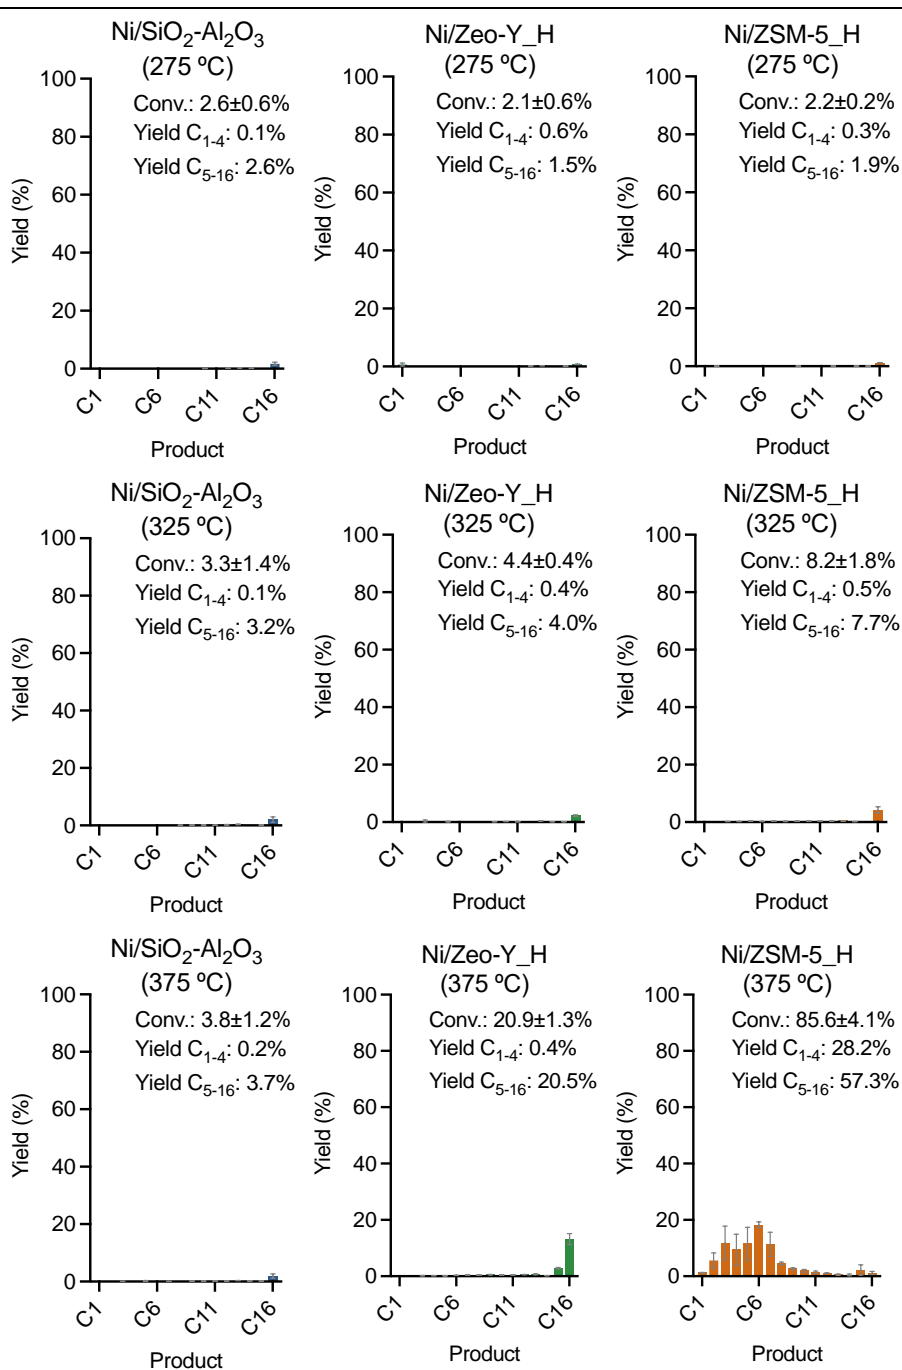

**Supplementary Figure 14 Product distributions after nC<sub>16</sub> (1.59 g) deconstructions.** In the presence of Ni-modified catalysts (0.1 g, metal loading = 2.5 wt%): Ni/SiO<sub>2</sub>-Al<sub>2</sub>O<sub>3</sub>, Ni/Zeo-Y\_H and Ni/ZSM-5\_H, 45 bar H<sub>2</sub>, 2 hrs. Note that nC<sub>12</sub> signal originated from the addition as an internal standard has been suppressed, and the yield of C<sub>12</sub> products was derived from the nC<sub>16</sub> substrate. Error bars = standard deviation. Source data are provided as a Source Data file.

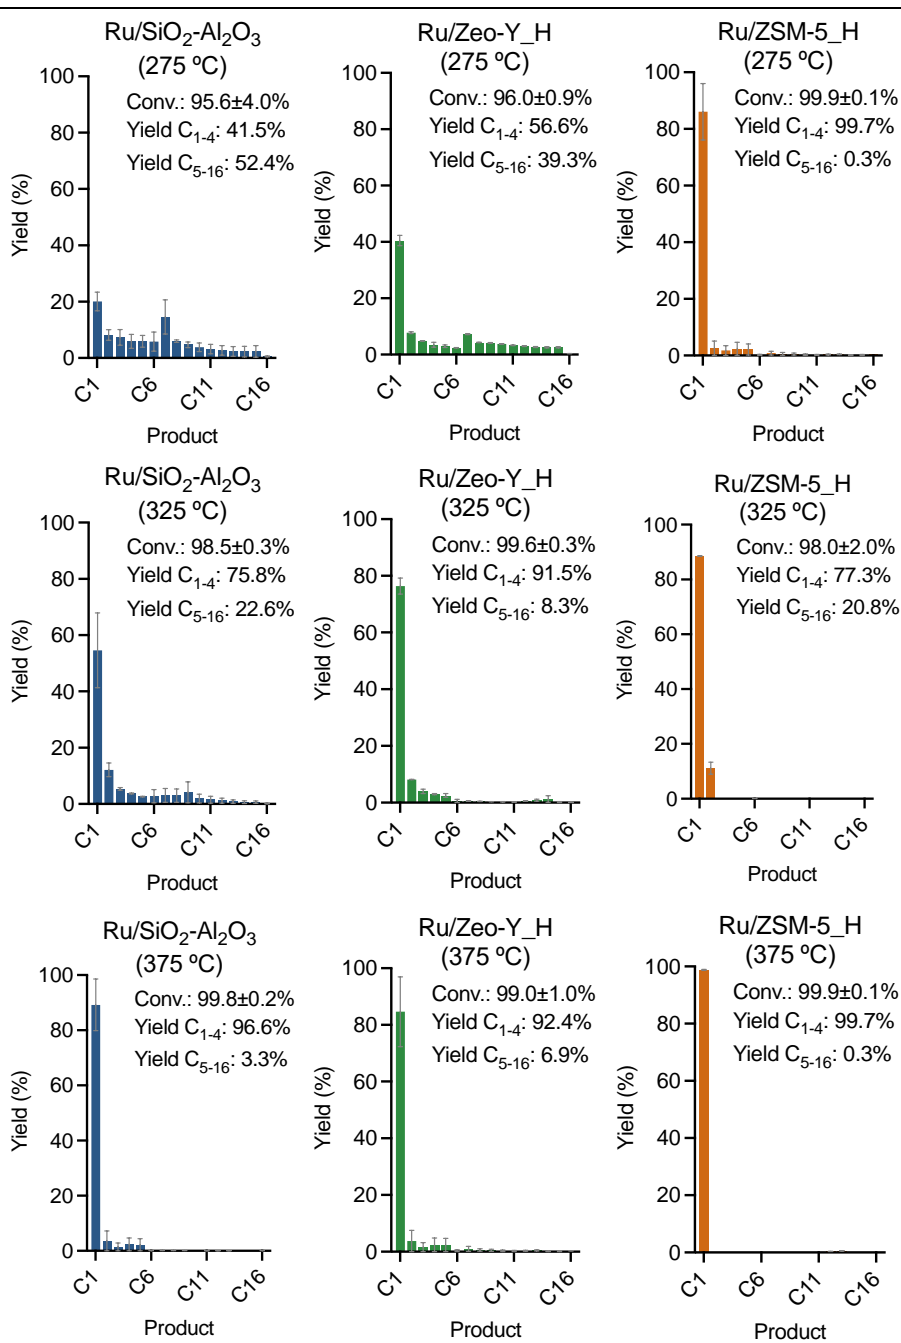

**Supplementary Figure 15 Product distributions after nC<sub>16</sub> (1.59 g) deconstructions.** In the presence of Ru-modified catalysts (0.1 g, metal loading = 2.5 wt%): Ru/SiO<sub>2</sub>-Al<sub>2</sub>O<sub>3</sub>, Ru/Zeo-Y\_H and Ru/ZSM-5\_H, 45 bar H<sub>2</sub>, 2 hrs. Note that nC<sub>12</sub> signal originated from the addition as an internal standard has been suppressed, and the yield of C<sub>12</sub> products was derived from the nC<sub>16</sub> substrate. Error bars = standard deviation. Source data are provided as a Source Data file.



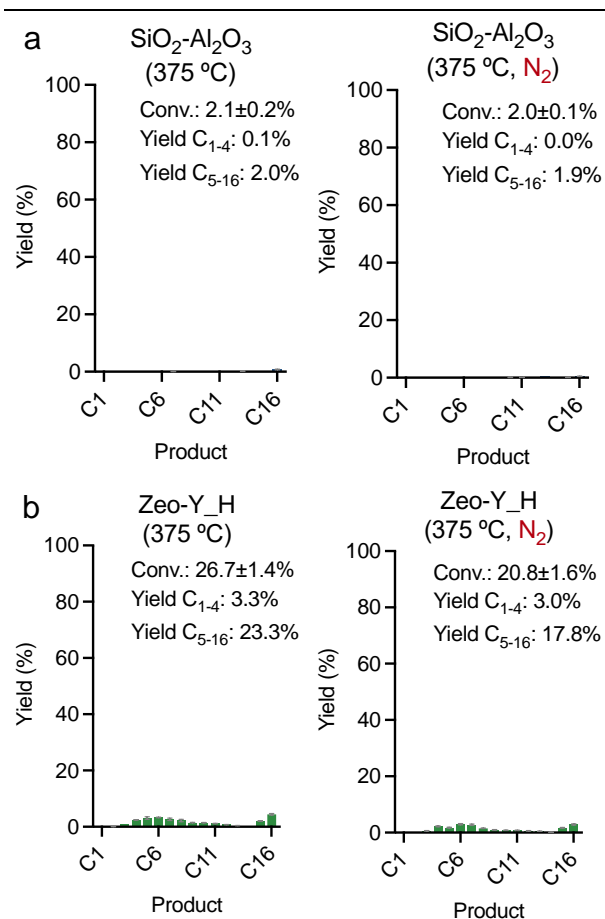

**Supplementary Figure 16 Product distributions after  $n\text{C}_{16}$  (1.59 g) deconstructions.** In the presence of **a**  $\text{SiO}_2\text{-Al}_2\text{O}_3$  (0.1 g) and **b** Zeo-Y\_H (0.1 g) under 45 bar  $\text{H}_2$  and  $\text{N}_2$  at 375 °C, 2 hrs. Note that  $n\text{C}_{12}$  signal originated from the addition as an internal standard has been suppressed, and the yield of  $\text{C}_{12}$  products was derived from the  $n\text{C}_{16}$  substrate. Error bars = standard deviation. Source data are provided as a Source Data file.

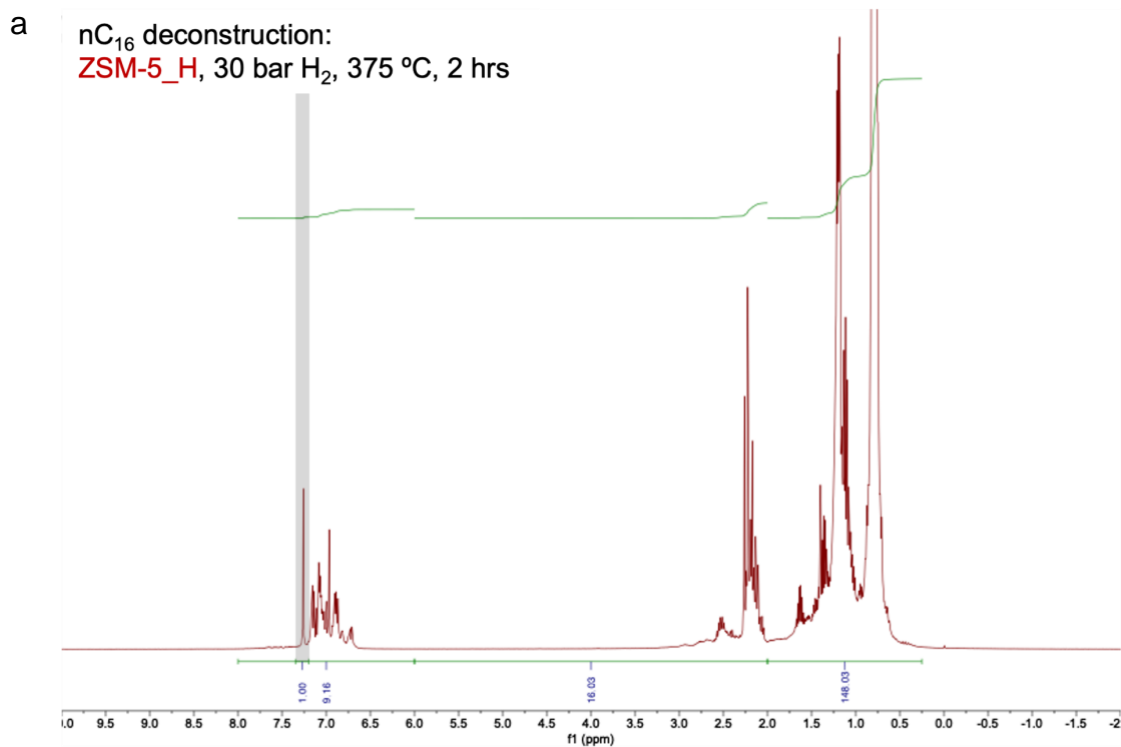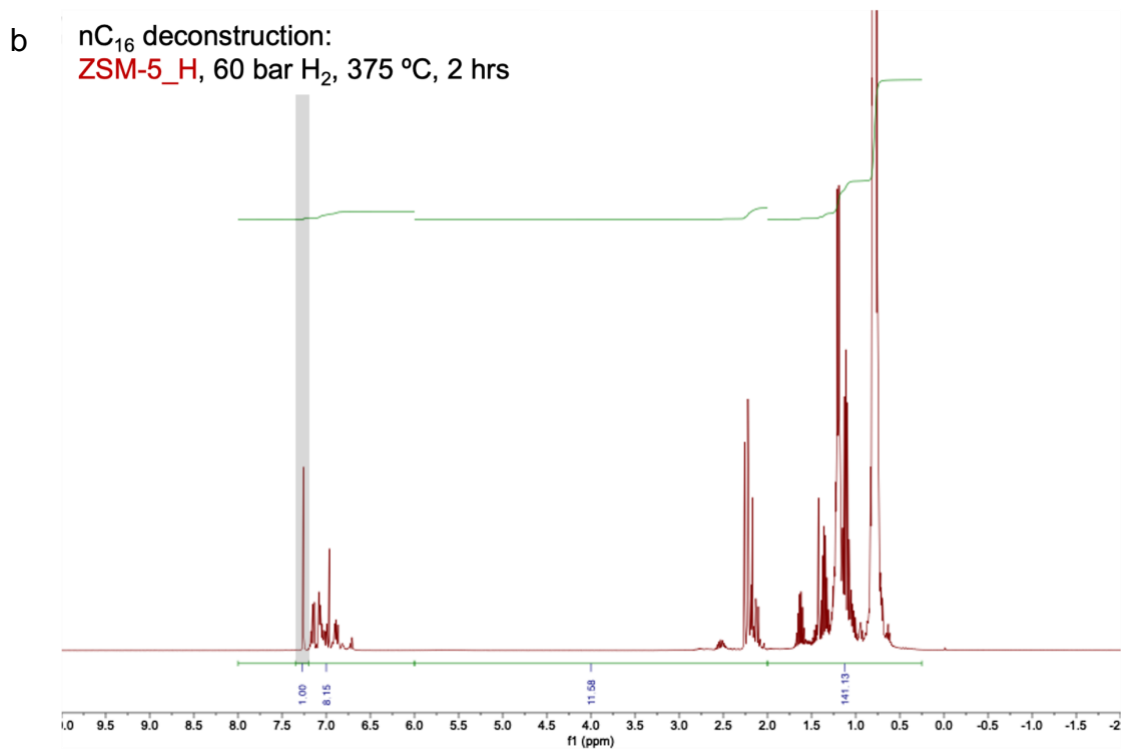

**Supplementary Figure 17  $^1H$  NMR spectra of liquid products after  $nC_{16}$  (1.59 g) deconstruction.** In the presence of ZSM-5\_H (0.1 g) 375 °C, 2 hrs under **a** 30 bar  $H_2$ , proton integration: 1.00, 9.16, 16.03, 148.03 =  $CDCl_3$  (gray marked area,  $\delta$  = 7.20-7.35), aromatic ( $\delta$  = 6.0-8.0), unsaturated ( $\delta$  = 2.0-6.0), saturated ( $\delta$  = 0.25-2.0) and **b** 60 bar  $H_2$ , proton integration: 1.00, 8.15, 11.58, 141.13 =  $CDCl_3$  (gray marked area,  $\delta$  = 7.20-7.35), aromatic ( $\delta$  = 6.0-8.0), unsaturated ( $\delta$  = 2.0-6.0), saturated ( $\delta$  = 0.25-2.0).

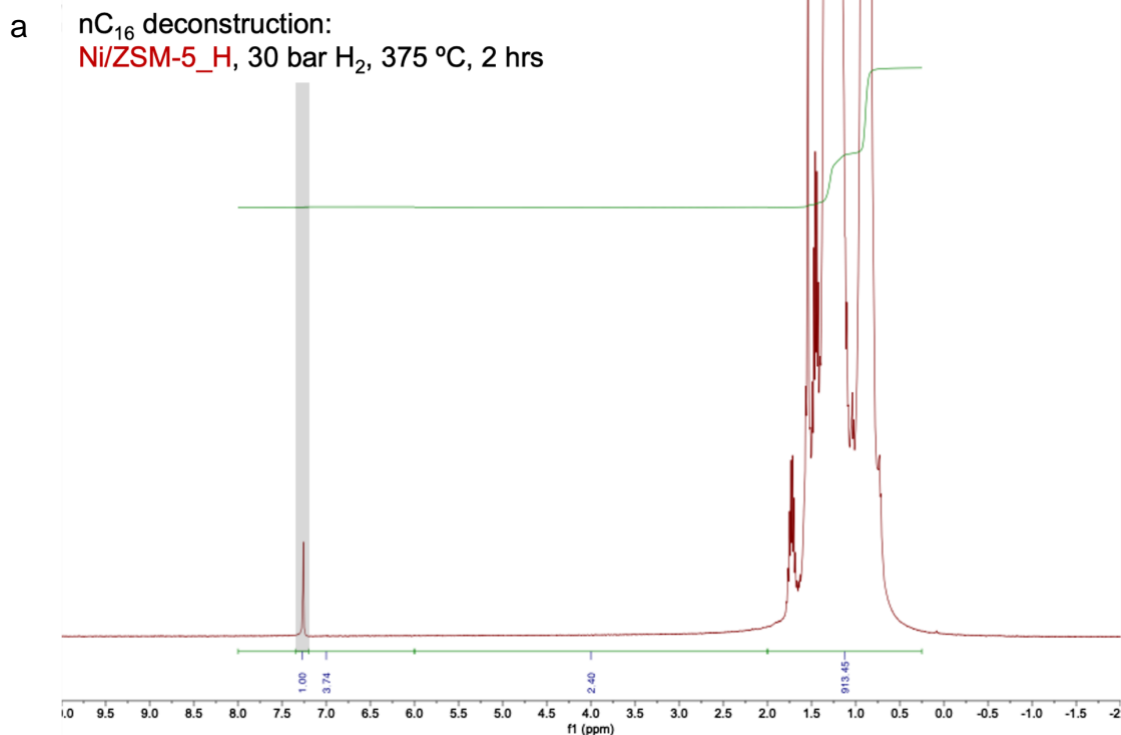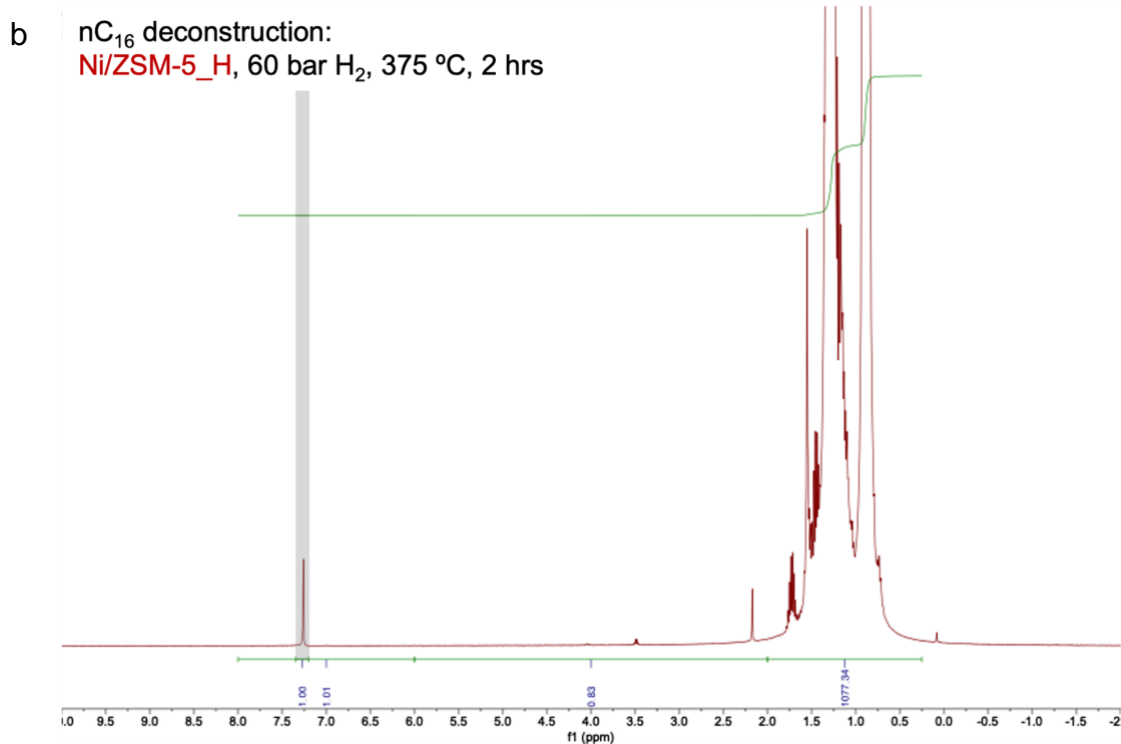

**Supplementary Figure 18** <sup>1</sup>H NMR spectra of liquid products after nC<sub>16</sub> (1.59 g) deconstruction. In the presence of Ni/ZSM-5\_H (0.1 g) 375 °C, 2 hrs under **a** 30 bar H<sub>2</sub>, proton integration: 1.00, 3.74, 2.40, 913.45 = CDCl<sub>3</sub> (gray marked area, δ = 7.20-7.35), aromatic (δ = 6.0-8.0), unsaturated (δ = 2.0-6.0), saturated (δ = 0.25-2.0) and **b** 60 bar H<sub>2</sub>, proton integration: 1.00, 1.01, 0.83, 1077.34 = CDCl<sub>3</sub> (gray marked area, δ = 7.20-7.35), aromatic (δ = 6.0-8.0), unsaturated (δ = 2.0-6.0), saturated (δ = 0.25-2.0).

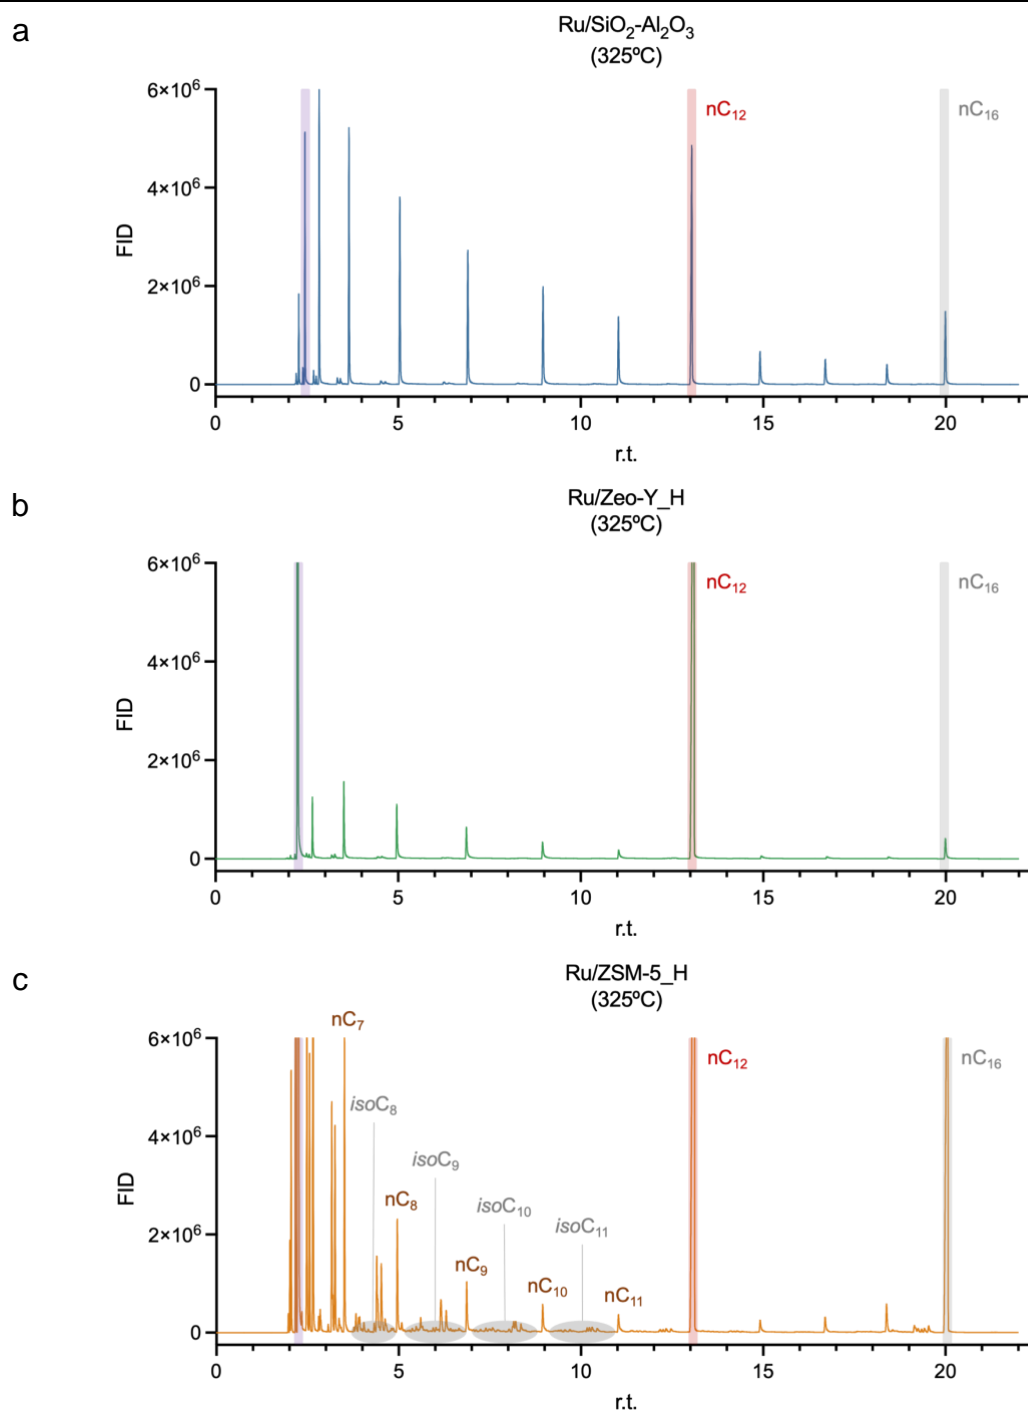

**Supplementary Figure 19 GC-FID traces of liquid products after the nC<sub>16</sub> (1.59 g) deconstruction.** In the presence of **a** Ru/SiO<sub>2</sub>-Al<sub>2</sub>O<sub>3</sub> (0.1 g, metal loading = 2.5 wt%), **b** Ru/Zeo-Y\_H (0.1 g, metal loading = 2.5 wt%) and **c** Ru/ZSM-5\_H (0.1 g, metal loading = 2.5 wt%) under 45 bar H<sub>2</sub> at 325 °C, 2 hrs. Note that the peaks with retention time ~2.7 and ~14.1 min were diethyl ether (solvent for the GC sample) and nC<sub>12</sub> (internal standard), respectively.

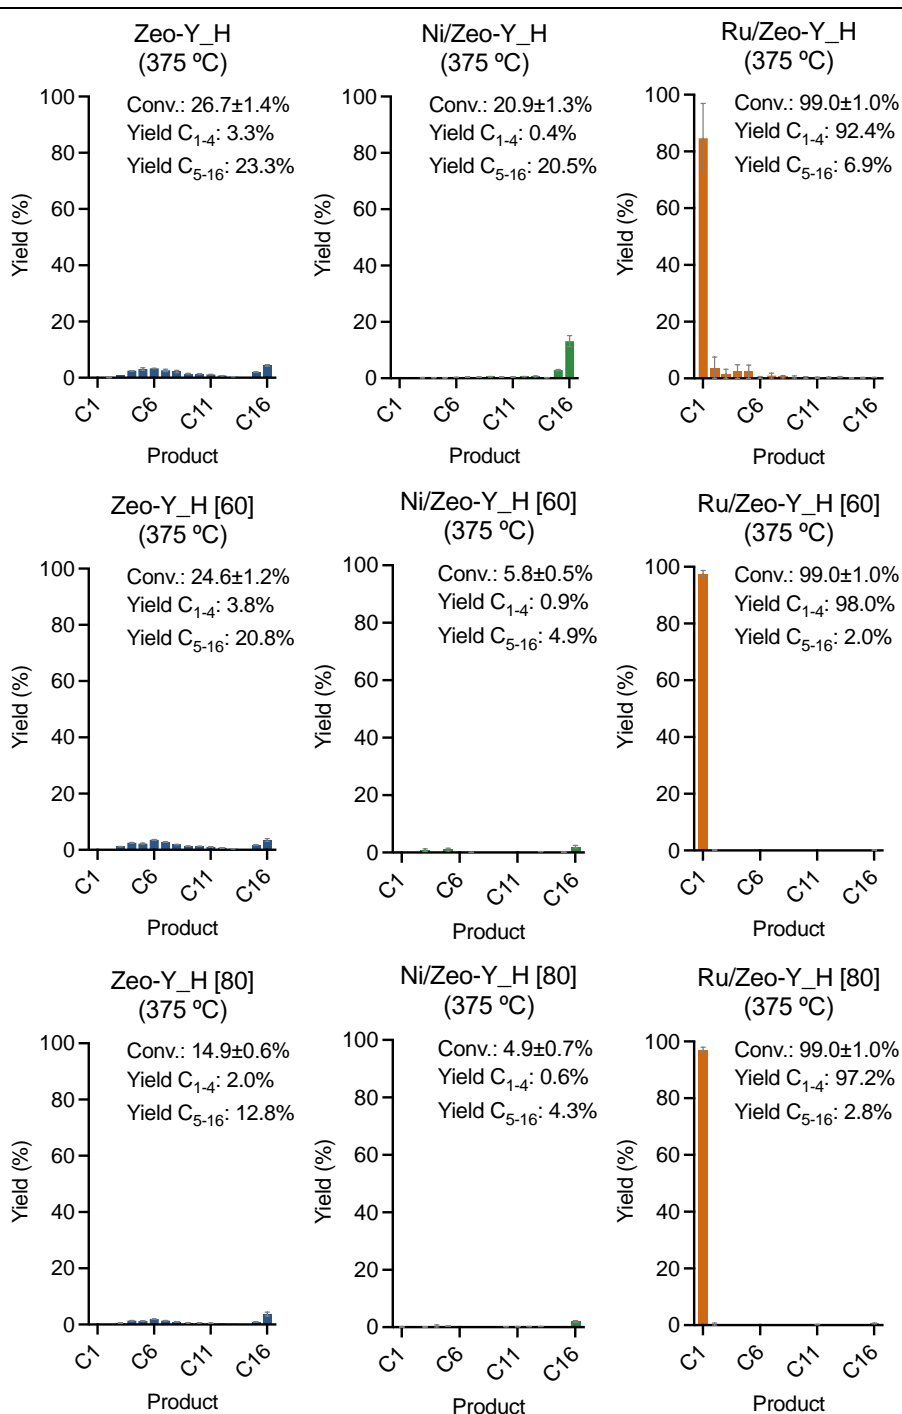

**Supplementary Figure 20 Product distributions after nC<sub>16</sub> (1.59 g) deconstructions.** In the presence of Zeo-Y\_H-based catalysts with various Si/Al ratios (0.1 g, metal loading = 2.5 wt%): Zeo-Y\_H, Zeo-Y\_H [60], Zeo-Y\_H [80], Ni/Zeo-Y\_H, Ni/Zeo-Y\_H [60], Ni/Zeo-Y\_H [80], Ru/Zeo-Y\_H, Ru/Zeo-Y\_H [60], and Ru/Zeo-Y\_H [80], 45 bar H<sub>2</sub>, 2 hrs. Note that nC<sub>12</sub> signal originated from the addition as an internal standard has been suppressed, and the yield of C<sub>12</sub> products herein is derived from the nC<sub>16</sub> substrate. Error bars = standard deviation. Source data are provided as a Source Data file.

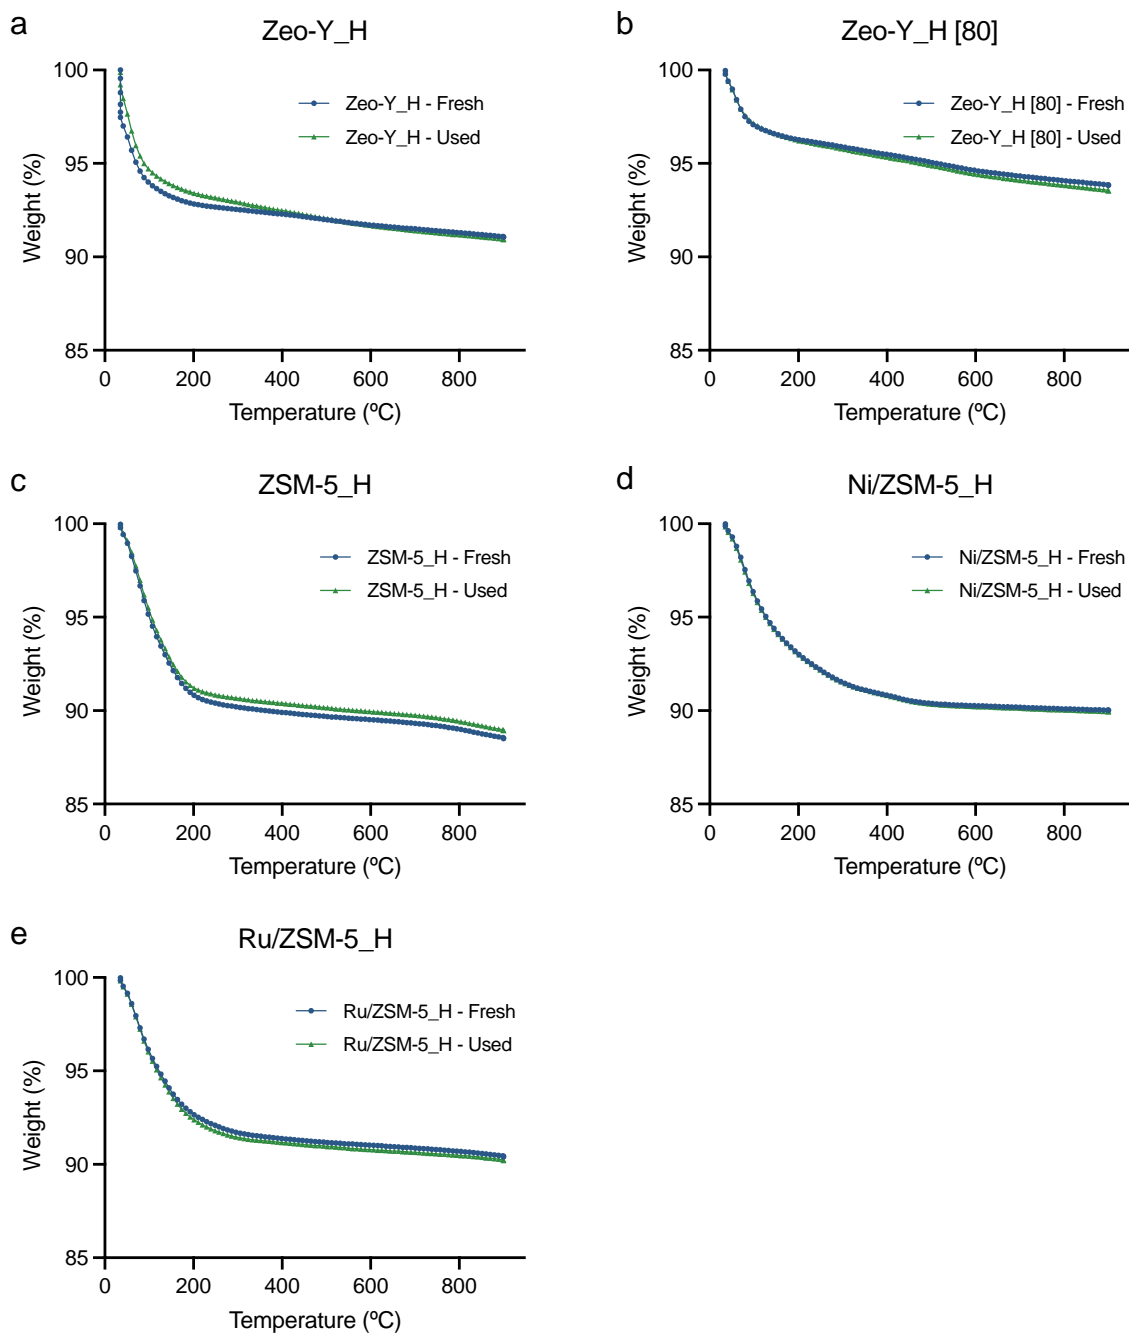

**Supplementary Figure 21 TGA analysis of fresh and used catalyst. a Zeo-Y\_H b Zeo-Y\_H [80] c ZSM-5\_H d Ni/ZSM-5\_H e Ru/ZSM-5\_H with a ramping rate of 5 °C/min from 35 to 900 °C and a flow rate of 20 mL/min under air. Source data are provided as a Source Data file.**

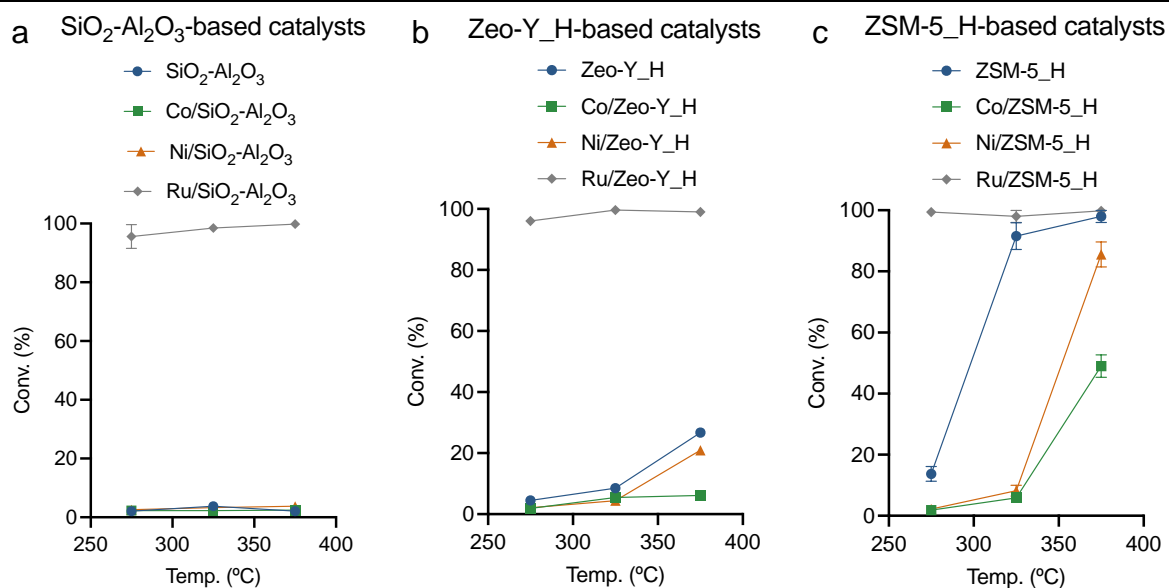

**Supplementary Figure 22 nC<sub>16</sub> (1.59 g) deconstructions with 45 bar H<sub>2</sub> at 275, 325 and 375 °C, 2 hrs.** In the presence of **a** SiO<sub>2</sub>-Al<sub>2</sub>O<sub>3</sub>-based catalysts (0.1 g, metal loading = 2.5 wt%): SiO<sub>2</sub>-Al<sub>2</sub>O<sub>3</sub>, Co/SiO<sub>2</sub>-Al<sub>2</sub>O<sub>3</sub>, Ni/SiO<sub>2</sub>-Al<sub>2</sub>O<sub>3</sub>, Ru/SiO<sub>2</sub>-Al<sub>2</sub>O<sub>3</sub>, **b** Zeo-Y\_H-based catalysts (0.1 g, metal loading = 2.5 wt%): Zeo-Y\_H, Co/Zeo-Y\_H, Ni/Zeo-Y\_H, Ru/Zeo-Y\_H, **c** ZSM-5\_H-based catalysts (0.1 g, metal loading = 2.5 wt%): ZSM-5\_H, Co/ZSM-5\_H, Ni/ZSM-5\_H, Ru/ZSM-5\_H. Error bars = standard deviation. Source data are provided as a Source Data file.

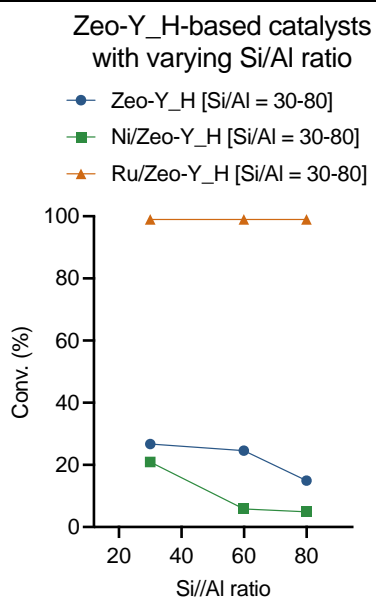

---

**Supplementary Figure 23 nC<sub>16</sub> (1.59 g) deconstructions with 45 bar H<sub>2</sub> at 375 °C, 2 hrs.** In the presence of Zeo-Y\_H-based catalysts with varying Si/Al ratios (0.1 g, metal loading = 2.5 wt%): Zeo-Y\_H, Zeo-Y\_H [60], Zeo-Y\_H [80], Ni/Zeo-Y\_H, Ni/Zeo-Y\_H [60], Ni/Zeo-Y\_H [80], Ru/Zeo-Y\_H, Ru/Zeo-Y\_H [60], and Ru/Zeo-Y\_H [80]. Error bars = standard deviation. Source data are provided as a Source Data file.



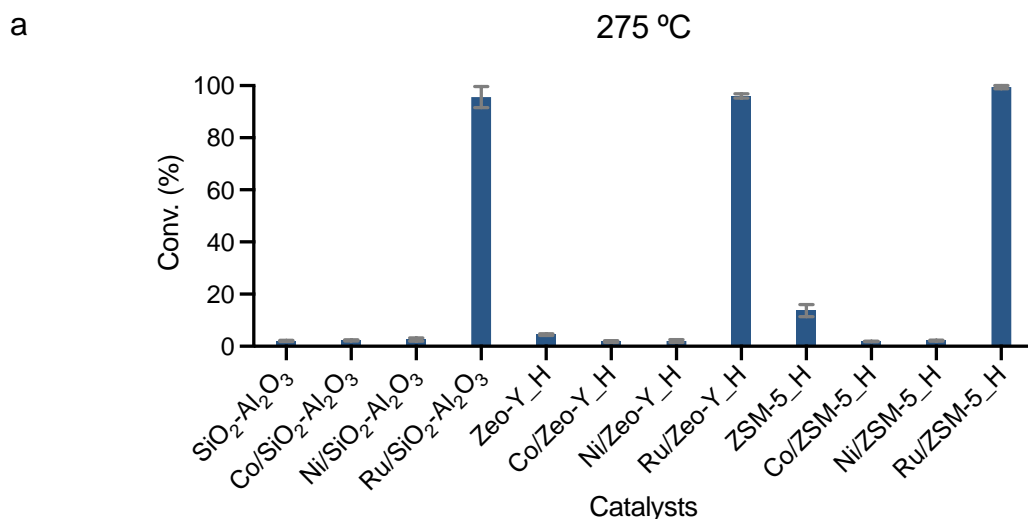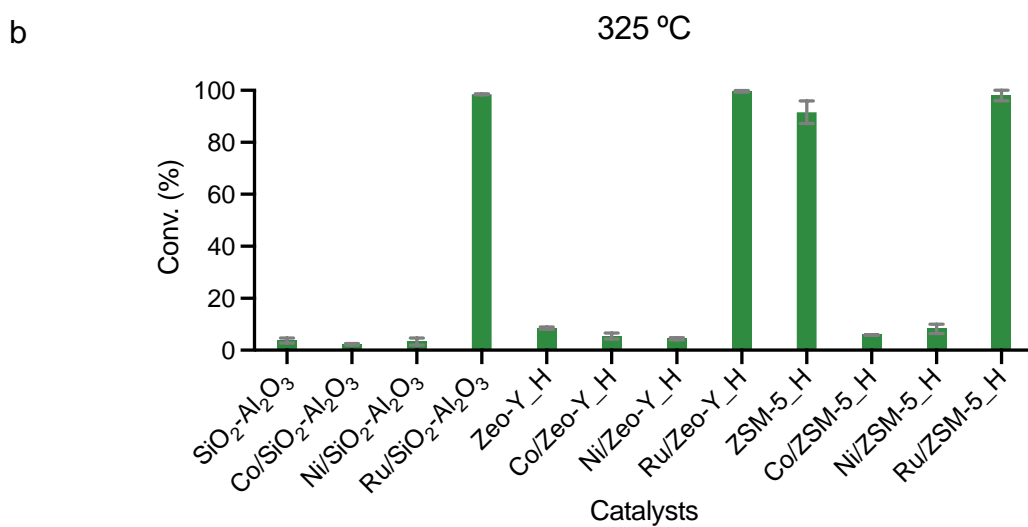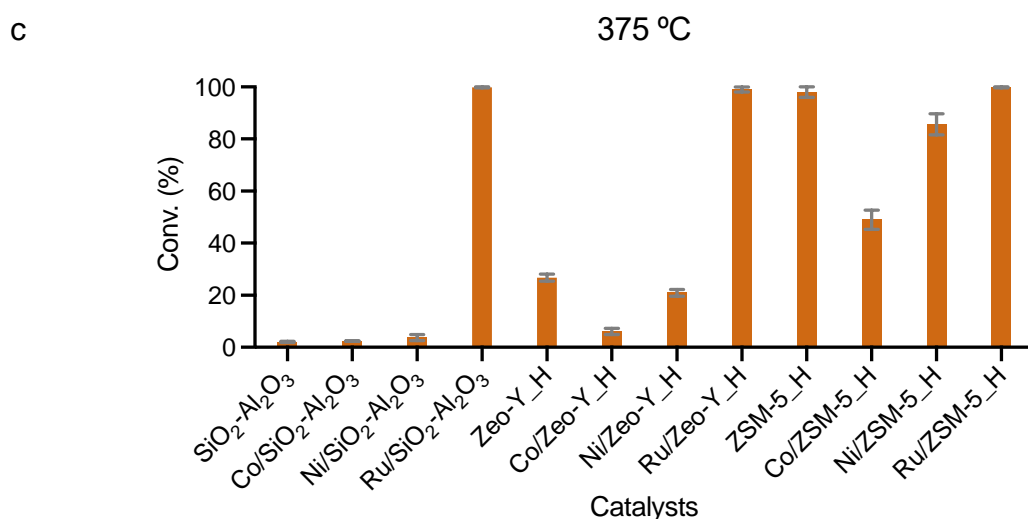

**Supplementary Figure 24 nC<sub>16</sub> (1.59 g) deconstruction with 45 bar H<sub>2</sub>, 2 hrs.** In the presence of SiO<sub>2</sub>-Al<sub>2</sub>O<sub>3</sub>, Co/SiO<sub>2</sub>-Al<sub>2</sub>O<sub>3</sub>, Ni/SiO<sub>2</sub>-Al<sub>2</sub>O<sub>3</sub>, Ru/SiO<sub>2</sub>-Al<sub>2</sub>O<sub>3</sub>, Zeo-Y\_H, Co/Zeo-Y\_H, Ni/Zeo-Y\_H, Ru/Zeo-Y\_H, ZSM-5\_H, Co/ZSM-5\_H, Ni/ZSM-5\_H and Ru/ZSM-5\_H (cat. = 0.1 g, metal loading = 2.5 wt%) at **a** 275 °C, **b** 325 °C and **c** 375 °C. Error bars = standard deviation. Source data are provided as a Source Data file.

**Supplementary Table 1** XPS surface relative atomic concentration of the ZSM-5\_H-based catalysts.

| Catalyst   | Si% (2p) | Al% (2p) | O% (1s) | Co% (2p) | Ni% (2p) | Ru% (3d) |
|------------|----------|----------|---------|----------|----------|----------|
| ZSM-5_H    | 28.6     | 2.8      | 68.7    | -        | -        | -        |
| Co/ZSM-5_H | 22.4     | 0.8      | 67.0    | 9.8      | -        | -        |
| Ni/ZSM-5_H | 22.3     | 4.8      | 64.6    | -        | 8.3      | -        |
| Ru/ZSM-5_H | 26.6     | 3.2      | 67.6    | -        | -        | 2.6      |

**Supplementary Table 2** XPS surface species and their relative concentrations of the ZSM-5\_H-based catalysts.

| Catalyst   | Specie %             |                                  |                                                   |                                     |
|------------|----------------------|----------------------------------|---------------------------------------------------|-------------------------------------|
| Co/ZSM-5_H | Co(0)% (2 <i>p</i> ) | CoO% (2 <i>p</i> )               | Co(OH) <sub>2</sub> % (2 <i>p</i> )               |                                     |
|            | 1.4                  | 2.2                              | 96.4                                              |                                     |
| Ni/ZSM-5_H | Ni(0)% (2 <i>p</i> ) | NiO% (2 <i>p</i> )               | Ni(O)OH% (2 <i>p</i> )                            | Ni(OH) <sub>2</sub> % (2 <i>p</i> ) |
|            | 1.8                  | 0.3                              | 60.4                                              | 37.5                                |
| Ru/ZSM-5_H | Ru(0)% (3 <i>d</i> ) | RuO <sub>2</sub> % (3 <i>d</i> ) | RuO <sub>2</sub> ·H <sub>2</sub> O% (3 <i>d</i> ) | RuCl <sub>3</sub> % (3 <i>d</i> )   |
|            | 86.0                 | 3.9                              | 6.7                                               | 3.4                                 |

**Supplementary Table 3** *n*-Hexadecane deconstructions with the 12 catalysts from the main library at 275, 325, and 375 °C including the carbon balance and hydrogen consumption.

n-hexadecane  $\xrightarrow[\text{45 bar H}_2, \Delta, \text{2 hrs}]{\text{Catalyst}}$  C<sub>1</sub>-isoC<sub>16</sub>

| Entry | Catalyst                                            | Temp. (°C) | Conv. (%) [g]        | C <sub>1-4</sub> Yield (%) [g] | C <sub>5-16</sub> Yield (%) [g] | H <sub>2</sub> Cons. (%) [g] |
|-------|-----------------------------------------------------|------------|----------------------|--------------------------------|---------------------------------|------------------------------|
| 1     | SiO <sub>2</sub> -Al <sub>2</sub> O <sub>3</sub>    | 275 °C     | 2.1±0.2 [0.03±0.00]  | 0.0 [0.00]                     | 2.1 [0.03]                      | 1 [0.00]                     |
| 2     | SiO <sub>2</sub> -Al <sub>2</sub> O <sub>3</sub>    | 325 °C     | 3.8±1.0 [0.06±0.02]  | 0.1 [0.00]                     | 3.7 [0.06]                      | 6 [0.01]                     |
| 3     | SiO <sub>2</sub> -Al <sub>2</sub> O <sub>3</sub>    | 375 °C     | 2.1±0.2 [0.03±0.00]  | 0.1 [0.00]                     | 2.0 [0.03]                      | 5 [0.01]                     |
| 4     | Zeo-Y_H                                             | 275 °C     | 4.5±0.3 [0.07±0.00]  | 0.3 [0.01]                     | 4.2 [0.07]                      | 2 [0.00]                     |
| 5     | Zeo-Y_H                                             | 325 °C     | 8.5±0.5 [0.14±0.01]  | 0.7 [0.01]                     | 7.7 [0.12]                      | 10 [0.02]                    |
| 6     | Zeo-Y_H                                             | 375 °C     | 26.7±1.4 [0.42±0.02] | 3.3 [0.05]                     | 23.3 [0.37]                     | 11 [0.03]                    |
| 7     | ZSM-5_H                                             | 275 °C     | 13.7±2.4 [0.22±0.04] | 3.8 [0.06]                     | 10.0 [0.16]                     | 5 [0.01]                     |
| 8     | ZSM-5_H                                             | 325 °C     | 91.6±4.4 [1.46±0.07] | 35.5 [0.58]                    | 56.2 [0.90]                     | 17 [0.04]                    |
| 9     | ZSM-5_H                                             | 375 °C     | 98.0±2.0 [1.56±0.03] | 77.3 [1.27]                    | 20.8 [0.33]                     | 23 [0.06]                    |
| 10    | Co/SiO <sub>2</sub> -Al <sub>2</sub> O <sub>3</sub> | 275 °C     | 2.3±0.2 [0.04±0.00]  | 0.1 [0.00]                     | 2.2 [0.03]                      | 4 [0.01]                     |
| 11    | Co/SiO <sub>2</sub> -Al <sub>2</sub> O <sub>3</sub> | 325 °C     | 2.3±0.3 [0.04±0.00]  | 0.0 [0.00]                     | 2.2 [0.03]                      | 2 [0.00]                     |
| 12    | Co/SiO <sub>2</sub> -Al <sub>2</sub> O <sub>3</sub> | 375 °C     | 2.4±0.1 [0.04±0.00]  | 0.1 [0.00]                     | 2.2 [0.03]                      | 7 [0.02]                     |
| 13    | Co/Zeo-Y_H                                          | 275 °C     | 1.9±0.4 [0.03±0.01]  | 0.0 [0.00]                     | 1.9 [0.03]                      | 4 [0.01]                     |
| 14    | Co/Zeo-Y_H                                          | 325 °C     | 5.5±1.2 [0.09±0.02]  | 0.2 [0.00]                     | 5.2 [0.08]                      | 6 [0.01]                     |
| 15    | Co/Zeo-Y_H                                          | 375 °C     | 6.1±1.2 [0.10±0.02]  | 1.2 [0.02]                     | 4.9 [0.08]                      | 8 [0.02]                     |
| 16    | Co/ZSM-5_H                                          | 275 °C     | 1.9±0.1 [0.03±0.00]  | 0.1 [0.00]                     | 1.8 [0.03]                      | 6 [0.01]                     |
| 17    | Co/ZSM-5_H                                          | 325 °C     | 5.9±0.1 [0.09±0.00]  | 1.2 [0.02]                     | 4.7 [0.07]                      | 6 [0.01]                     |
| 18    | Co/ZSM-5_H                                          | 375 °C     | 49.0±3.7 [0.78±0.06] | 12.7 [0.21]                    | 36.3 [0.58]                     | 13 [0.03]                    |
| 19    | Ni/SiO <sub>2</sub> -Al <sub>2</sub> O <sub>3</sub> | 275 °C     | 2.6±0.6 [0.04±0.01]  | 0.1 [0.00]                     | 2.6 [0.04]                      | 3 [0.01]                     |
| 20    | Ni/SiO <sub>2</sub> -Al <sub>2</sub> O <sub>3</sub> | 325 °C     | 3.3±1.4 [0.05±0.02]  | 0.1 [0.00]                     | 3.2 [0.05]                      | 4 [0.01]                     |
| 21    | Ni/SiO <sub>2</sub> -Al <sub>2</sub> O <sub>3</sub> | 375 °C     | 3.8±1.2 [0.06±0.02]  | 0.2 [0.00]                     | 3.7 [0.06]                      | 7 [0.02]                     |
| 22    | Ni/Zeo-Y_H                                          | 275 °C     | 2.1±0.6 [0.03±0.01]  | 0.6 [0.01]                     | 1.5 [0.02]                      | 4 [0.01]                     |
| 23    | Ni/Zeo-Y_H                                          | 325 °C     | 4.4±0.4 [0.07±0.01]  | 0.4 [0.01]                     | 4.0 [0.06]                      | 5 [0.01]                     |
| 24    | Ni/Zeo-Y_H                                          | 375 °C     | 20.9±1.3 [0.33±0.02] | 0.4 [0.01]                     | 20.5 [0.31]                     | 8 [0.02]                     |
| 25    | Ni/ZSM-5_H                                          | 275 °C     | 2.2±0.2 [0.03±0.00]  | 0.3 [0.00]                     | 1.9 [0.03]                      | 4 [0.01]                     |
| 26    | Ni/ZSM-5_H                                          | 325 °C     | 8.2±1.8 [0.13±0.03]  | 0.5 [0.01]                     | 7.7 [0.12]                      | 7 [0.02]                     |
| 27    | Ni/ZSM-5_H                                          | 375 °C     | 85.6±4.1 [1.36±0.07] | 28.2 [0.46]                    | 57.3 [0.92]                     | 13 [0.03]                    |
| 28    | Ru/SiO <sub>2</sub> -Al <sub>2</sub> O <sub>3</sub> | 275 °C     | 95.6±4.0 [1.52±0.06] | 41.5 [0.71]                    | 54.2 [0.86]                     | 27 [0.07]                    |
| 29    | Ru/SiO <sub>2</sub> -Al <sub>2</sub> O <sub>3</sub> | 325 °C     | 98.5±0.3 [1.57±0.00] | 75.8 [1.33]                    | 22.6 [0.36]                     | 60 [0.14]                    |
| 30    | Ru/SiO <sub>2</sub> -Al <sub>2</sub> O <sub>3</sub> | 375 °C     | 99.8±0.2 [1.59±0.00] | 96.6 [1.72]                    | 3.3 [0.05]                      | 83 [0.20]                    |
| 31    | Ru/Zeo-Y_H                                          | 275 °C     | 96.0±0.9 [1.53±0.01] | 56.6 [0.99]                    | 39.3 [0.63]                     | 44 [0.11]                    |
| 32    | Ru/Zeo-Y_H                                          | 325 °C     | 99.6±0.3 [1.58±0.00] | 91.5 [1.62]                    | 8.3 [0.13]                      | 73 [0.18]                    |
| 33    | Ru/Zeo-Y_H                                          | 375 °C     | 99.0±1.0 [1.57±0.02] | 92.4 [1.65]                    | 6.9 [0.11]                      | 85 [0.21]                    |
| 34    | Ru/ZSM-5_H                                          | 275 °C     | 99.4±0.6 [1.58±0.01] | 92.8 [1.65]                    | 6.6 [0.10]                      | 54 [0.13]                    |
| 35    | Ru/ZSM-5_H                                          | 325 °C     | 98.0±2.0 [1.56±0.03] | 99.7 [1.78]                    | 0.3 [0.01]                      | 88 [0.21]                    |
| 36    | Ru/ZSM-5_H                                          | 375 °C     | 99.8±0.2 [1.59±0.00] | 98.8 [1.77]                    | 1.1 [0.02]                      | 88 [0.21]                    |

Reaction conditions: *n*-hexadecane (1.59 g, 7.0 mmol), catalyst (0.1 g, metal loading = 2.5 wt%), S/C ratio (substrate/catalyst weight ratio) ~16, 45 bar H<sub>2</sub>, 2 hrs. \* All yields were calculated as the carbon yield and isomerized C<sub>16</sub> (*iso*C<sub>16</sub>) are considered as products. Note that ~87% H<sub>2</sub> consumption (~105.0 mmol) is able to produce methane quantitatively due to the ~1.15 eq. H<sub>2</sub> stoichiometry.

**Supplementary Table 4** *n*-Hexadecane deconstruction using the Zeo-Y\_H-based catalysts with varying SARs including the carbon balance and hydrogen consumption.

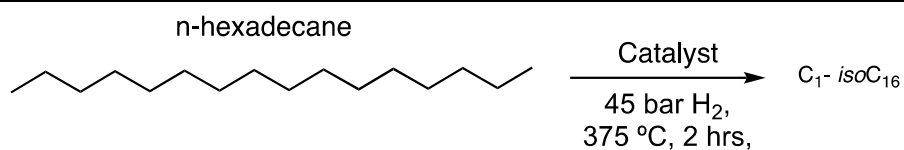

| Entry | Catalyst        | Conv. (%) [g]        | C <sub>1-4</sub> Yield (%) [g] | C <sub>5-16</sub> Yield (%) [g] | H <sub>2</sub> Cons. (%) [g] |
|-------|-----------------|----------------------|--------------------------------|---------------------------------|------------------------------|
| 1     | Zeo-Y_H         | 26.7±1.4 [0.42±0.02] | 3.3 [0.05]                     | 23.3 [0.37]                     | 11 [0.03]                    |
| 2     | Zeo-Y_H [60]    | 24.6±1.2 [0.39±0.02] | 3.8 [0.06]                     | 20.8 [0.33]                     | 8 [0.02]                     |
| 3     | Zeo-Y_H [80]    | 14.9±0.6 [0.24±0.01] | 2.0 [0.03]                     | 12.8 [0.20]                     | 6 [0.01]                     |
| 4     | Ni/Zeo-Y_H      | 20.9±1.3 [0.33±0.02] | 0.4 [0.01]                     | 20.5 [0.31]                     | 8 [0.02]                     |
| 5     | Ni/Zeo-Y_H [60] | 5.8±0.5 [0.09±0.01]  | 0.9 [0.01]                     | 4.9 [0.08]                      | 7 [0.02]                     |
| 6     | Ni/Zeo-Y_H [80] | 4.9±0.7 [0.08±0.01]  | 0.6 [0.01]                     | 4.3 [0.07]                      | 4 [0.01]                     |
| 7     | Ru/Zeo-Y_H      | 99.0±1.0 [1.57±0.02] | 92.4 [1.65]                    | 6.9 [0.11]                      | 85 [0.21]                    |
| 8     | Ru/Zeo-Y_H [60] | 99.0±1.0 [1.57±0.02] | 98.0 [1.76]                    | 2.0 [0.02]                      | 86 [0.21]                    |
| 9     | Ru/Zeo-Y_H [80] | 99.0±1.0 [1.57±0.02] | 97.2 [1.75]                    | 2.8 [0.03]                      | 87 [0.21]                    |

Reaction conditions: *n*-hexadecane (1.59 g, 7.0 mmol), catalyst (0.1 g, metal loading = 2.5 wt%), S/C ratio (substrate/catalyst weight ratio) ~16, 45 bar H<sub>2</sub>, 375 °C, 2 hrs. \* All yields were calculated as the carbon yield and isomerized C<sub>16</sub> (*iso*C<sub>16</sub>) are considered as products. Note that ~87% H<sub>2</sub> consumption (~105.0 mmol) is able to produce methane quantitatively due to the ~1.15 eq. H<sub>2</sub> stoichiometry.

**Supplementary Table 5** Degrees of saturation of the liquid products obtained from the deconstruction of *n*-hexadecane.

| Entry | Catalyst        | Conversion (%) | Saturated (%; $\delta = 0.25-2.0$ ) | Unsaturated (%; $\delta = 2.0-6.0$ ) | Aromatic (%; $\delta = 6.0-8.0$ ) |
|-------|-----------------|----------------|-------------------------------------|--------------------------------------|-----------------------------------|
| 1     | Zeo-Y_H         | 26.7±1.4       | 98.8±0.1                            | 1.2±0.1                              | 0.1±0.1                           |
| 2     | Zeo-Y_H [60]    | 24.6±1.2       | 98.6±0.1                            | 1.4±0.1                              | 0.1±0.1                           |
| 3     | Zeo-Y_H [80]    | 14.9±0.6       | 98.7±0.1                            | 1.3±0.1                              | 0.1±0.1                           |
| 4     | Ni/Zeo-Y_H      | 20.9±1.3       | 99.8±0.2                            | 0.2±0.2                              | 0.1±0.1                           |
| 5     | Ni/Zeo-Y_H [60] | 5.8±0.5        | 99.7±0.3                            | 0.3±0.3                              | 0.1±0.1                           |
| 6     | Ni/Zeo-Y_H [80] | 4.9±0.7        | 99.5±0.5                            | 0.5±0.5                              | 0.1±0.1                           |

Reaction conditions: *n*-hexadecane (1.59 g, 7.0 mmol), catalyst (0.1 g, metal loading = 2.5 wt%), 45 bar H<sub>2</sub>, 375 °C, 2 hrs. Note that degrees of saturation are defined by the ratio of proton integrations in the <sup>1</sup>H NMR spectra to indicate the adjacent carbon-carbon bonds (saturated:  $\delta = 0.25-2.0$ , unsaturated:  $\delta = 2.0-6.0$  and aromatics:  $\delta = 6.0-8.0$ ) given the C-H and C-C bond exclusivity of hydrocarbons.

### Supplementary References

1. Biesinger, M. C. *et al.* Resolving surface chemical states in XPS analysis of first row transition metals, oxides and hydroxides: Cr, Mn, Fe, Co and Ni. *Appl. Surf. Sci.* **257**, 2717–2730 (2011).
2. Morgan, D. J. Resolving ruthenium: XPS studies of common ruthenium materials. *Surf. Interface Anal.* **47**, 1072–1079 (2015).
